# Supplementary material for: Effect of imbalance in folate and vitamin B12 in maternal/parental diet on global methylation and regulatory miRNAs
Source: PubMed Central journal article supplement (PMC6879517; doi:10.1038/s41598-019-54070-9), 2019-11-26
Supplement: 41598_2019_54070_MOESM1_ESM.pdf [file 41598_2019_54070_MOESM1_ESM.pdf]

**Effect of imbalance in folate and vitamin B12 in maternal/ parental diet on global methylation  
and regulatory miRNAs**

Aatish Mahajan<sup>1</sup>, Divika Sapehia<sup>1</sup>, Shilpa Thakur<sup>1</sup>, Mohan Raj P.S<sup>1</sup>, Rashmi Bagga<sup>2</sup> and  
Jyotdeep Kaur<sup>1\*</sup>

<sup>1</sup> Department of Biochemistry, Postgraduate Institute of Medical Education and Research, India

<sup>2</sup>Department of Obstetrics and Gynecology, Postgraduate Institute of Medical Education and  
Research, India

\*Corresponding author

Prof. Jyotdeep Kaur

Department of Biochemistry

Research Block-A,

PGIMER, Chandigarh, PIN-160012

Tel: 91-172-2755181

E-mail: [jyotdeep2001@yahoo.co.in](mailto:jyotdeep2001@yahoo.co.in)

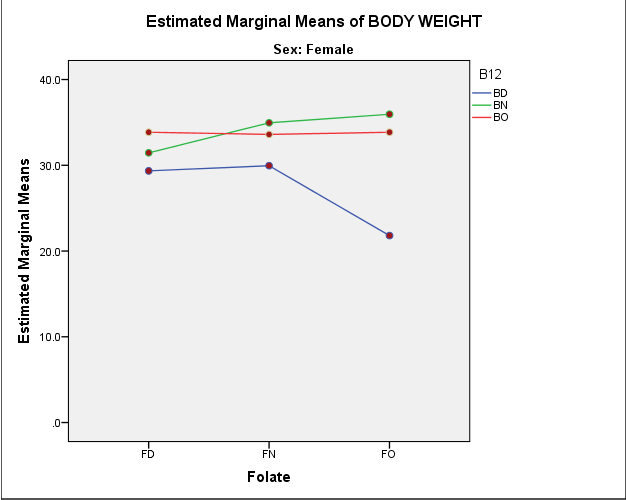

Supplementary figure 1 : Profile plot of body weight (F= 57.7, df= 8)

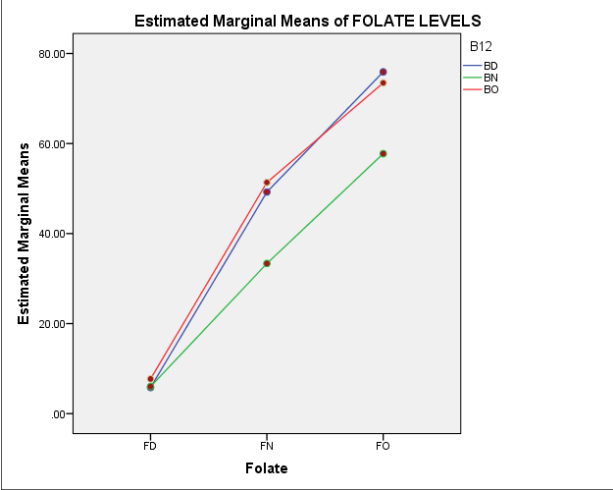

(A)

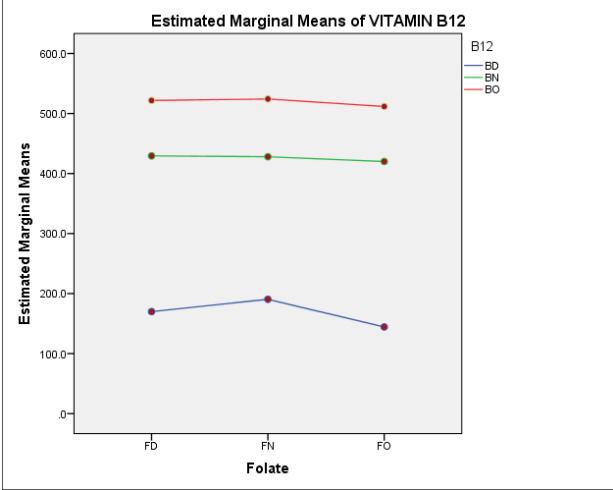

(B)

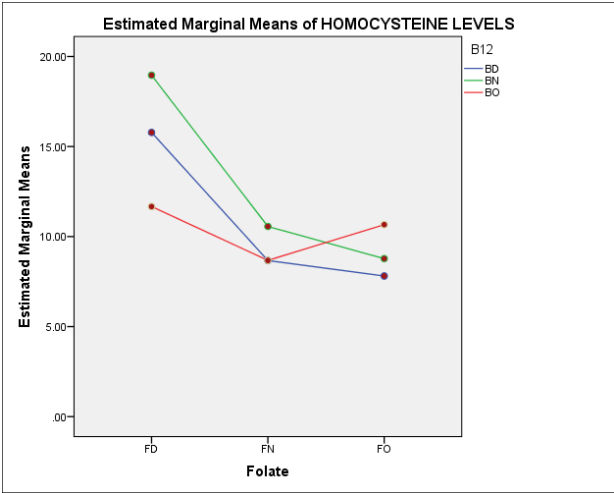

(C)

Supplementary figure 2 : Profile plots of serum levels of folate, B12 and homocysteine (A) Folate (F= 144.3, df=8) (B) Vitamin B12 (F= 3500.2, df=8) (C) Homocysteine (F= 103.1, df=8)

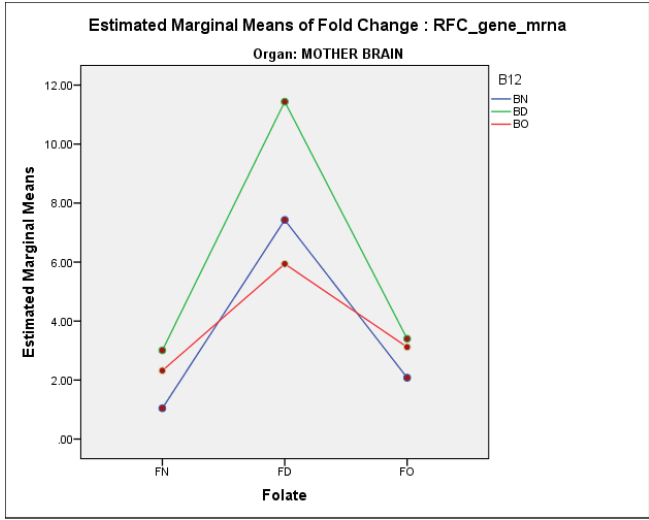

(A)

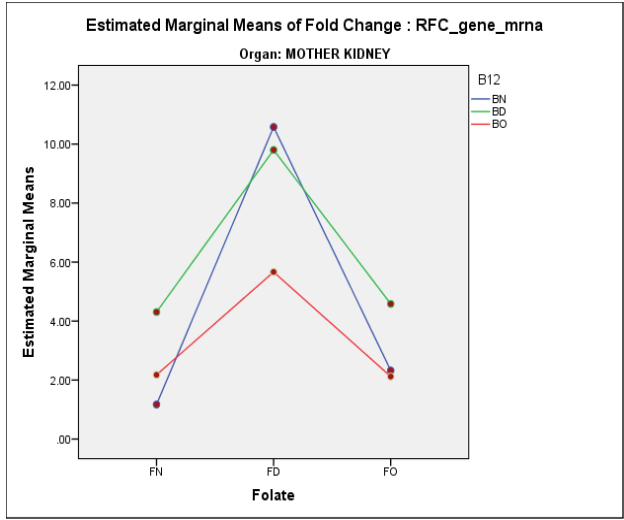

(B)

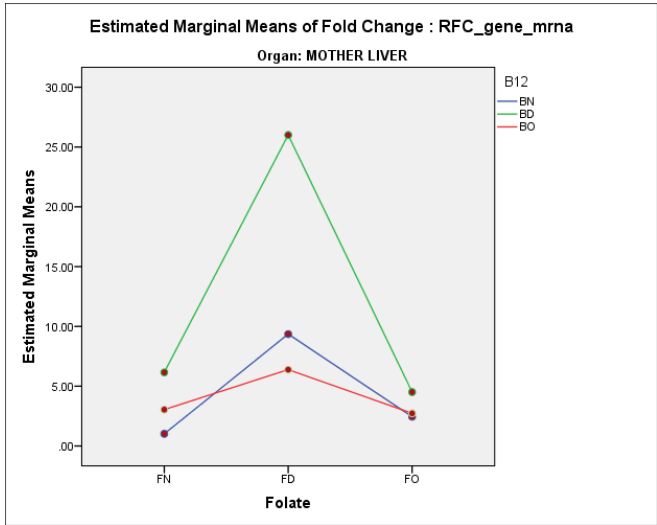

(C)

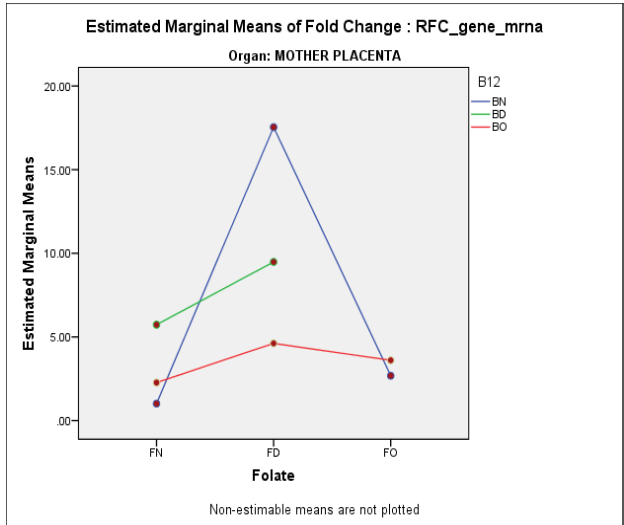

(D)

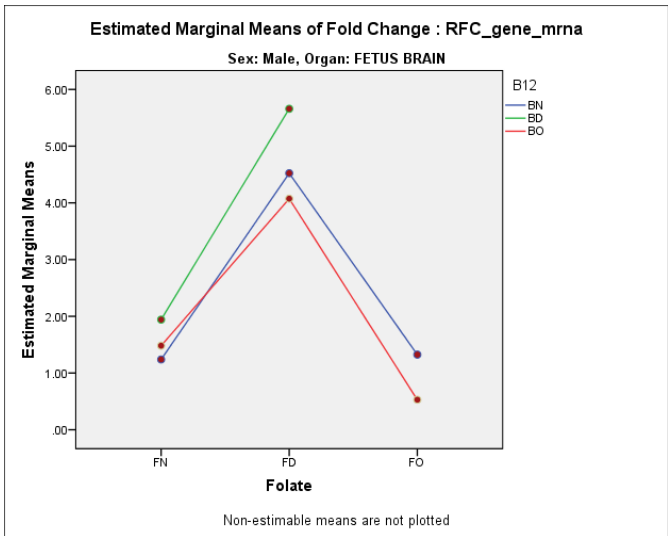

E (i)

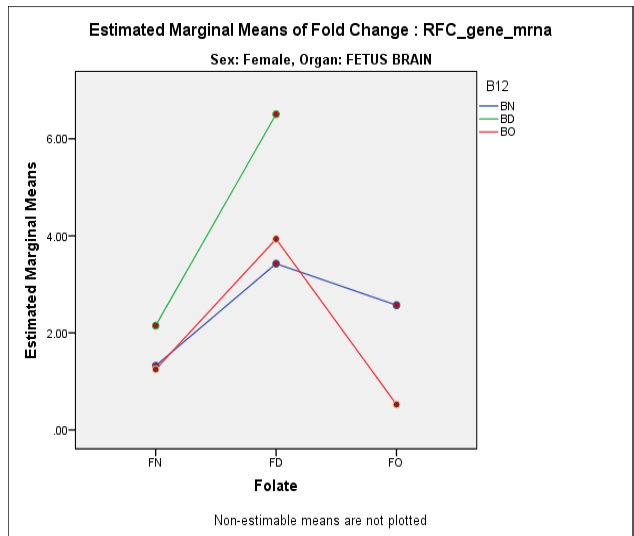

E (ii)

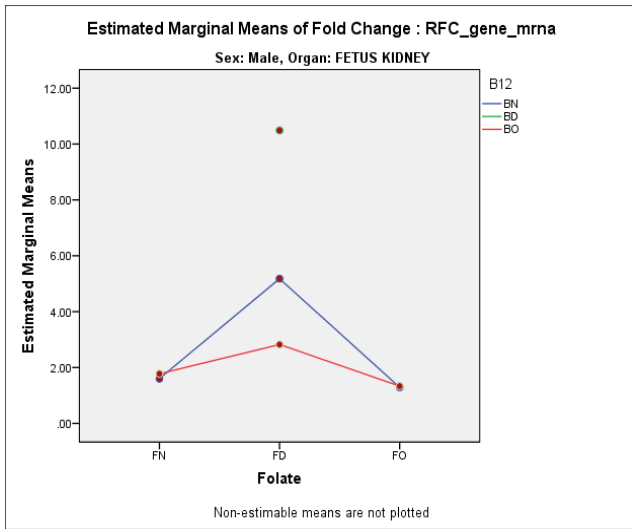

F (i)

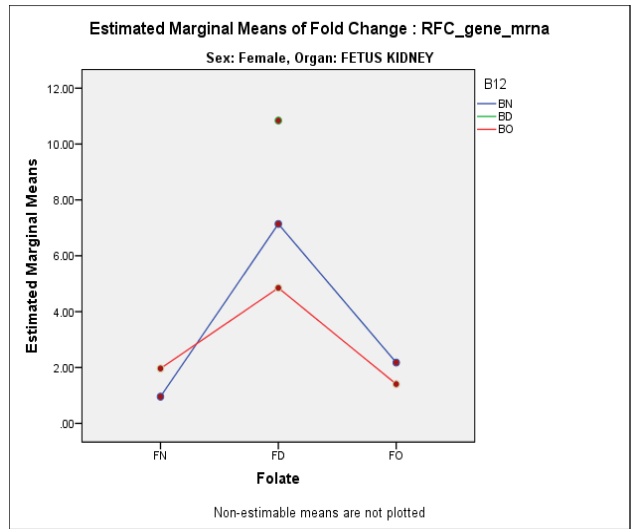

F (ii)

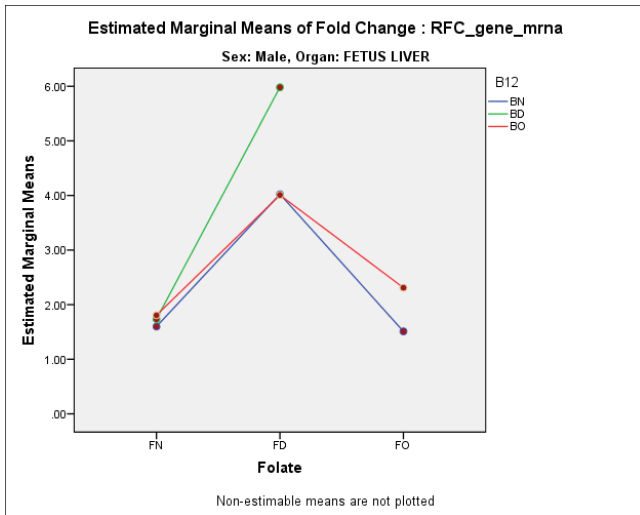

G (i)

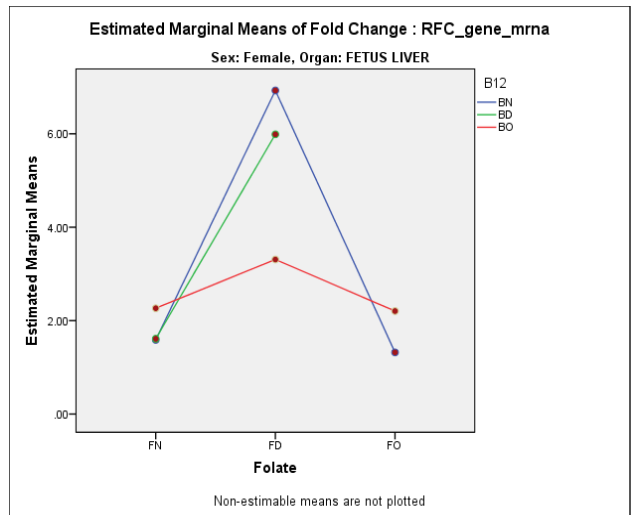

G (ii)

**Supplementary figure 3 : Profile plots of mRNA expression of RFC in maternal tissues (A) Brain (F=6.0, df=4) (B) Kidney (F=25.9, df=4) (C) Liver (F=270.5, df=4) (D) Placenta (F=50.4, df=3), fetal tissues (E) (i) Brain (Male) (F=1.29, df=3) (ii) Brain (Female) (F=14.9, df=3), (F) (i) Kidney (Male) (F= 6.3, df=2) (ii) Kidney (Fe-male) (F=8.7, df=2), (G) (i) Liver (Male) (F=5.13, df=3) (ii) Liver (Fe-male) (F=18.7,df=3)**

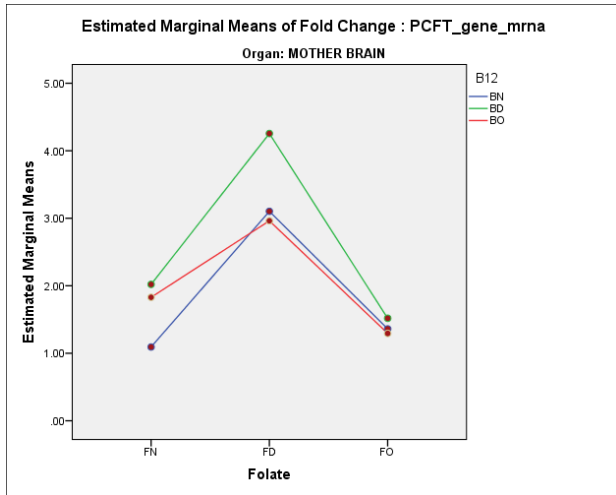

(A)

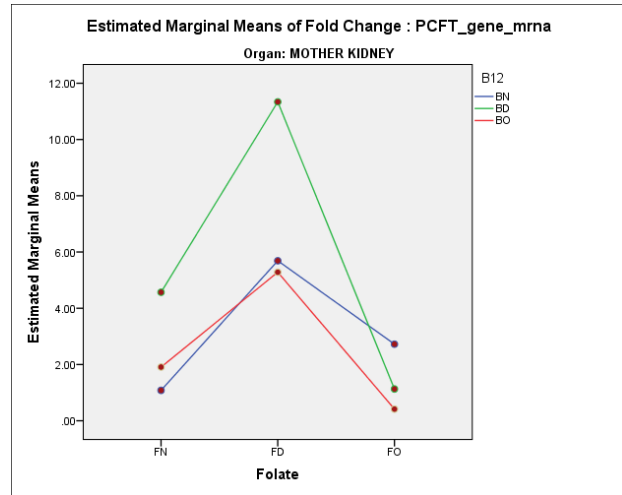

(B)

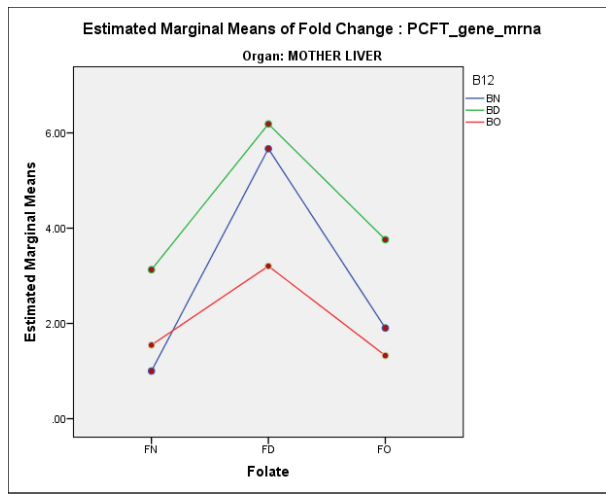

(C)

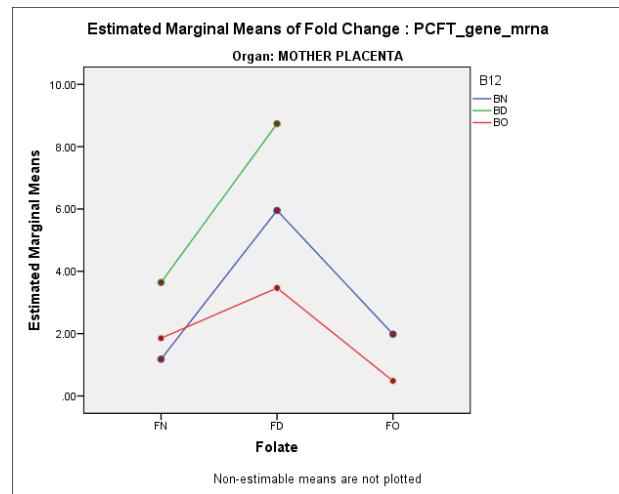

(D)

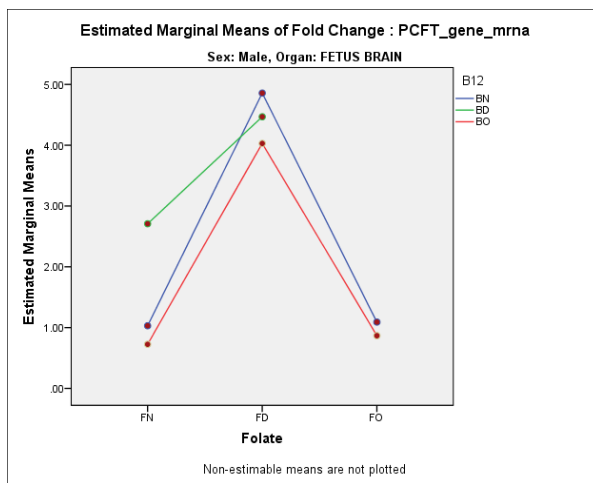

E (i)

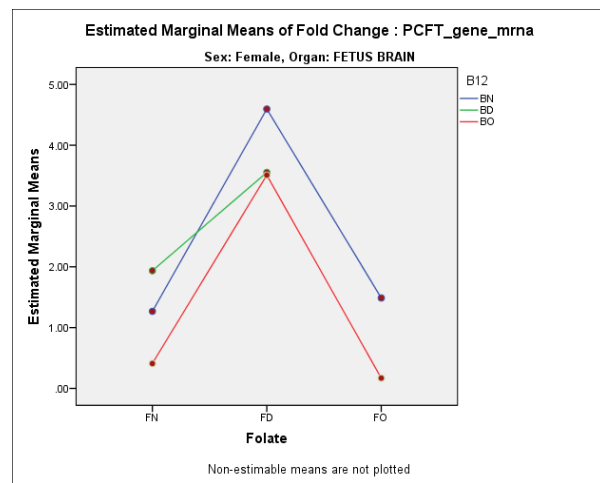

E (ii)

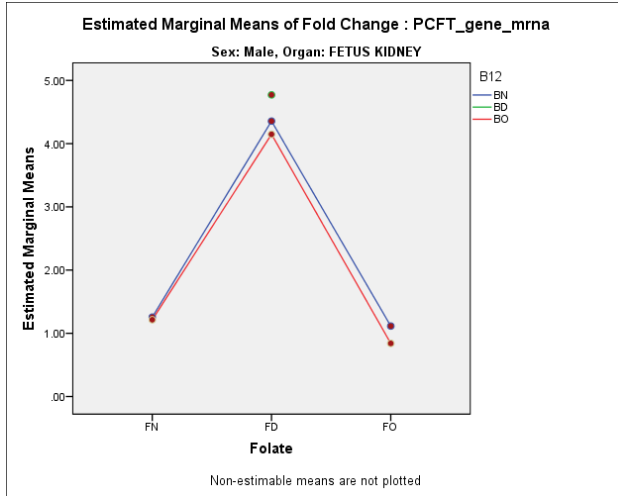

F (i)

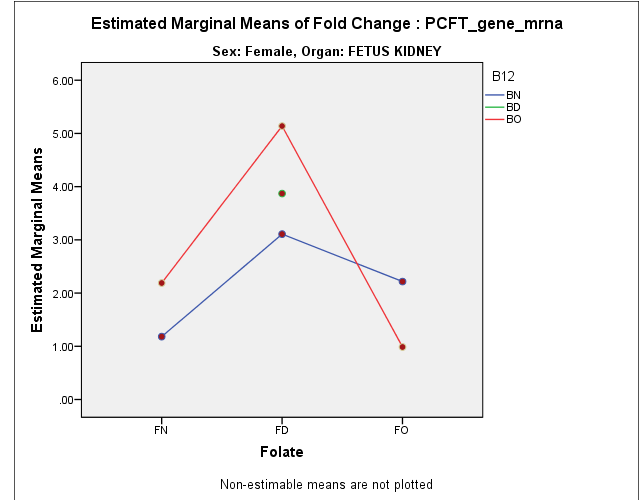

F (ii)

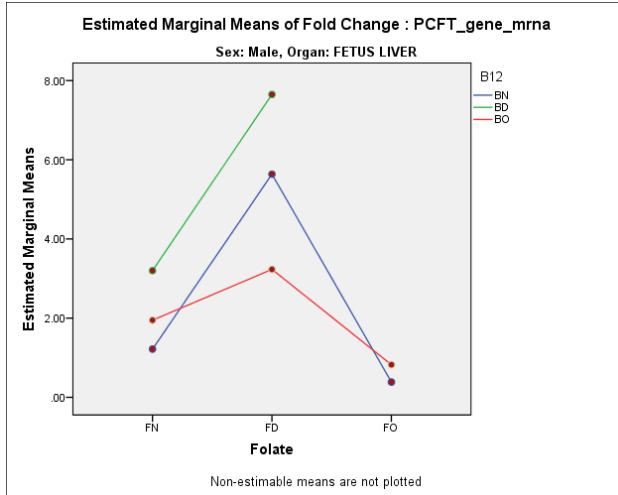

G (i)

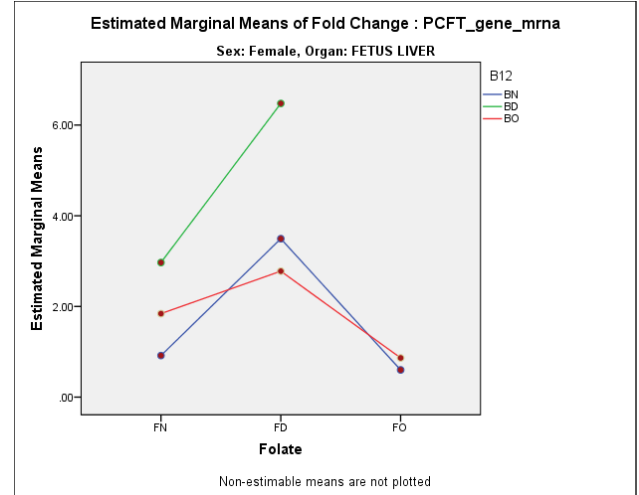

G (ii)

Supplementary figure 4: Profile plots of mRNA expression of PCFT in maternal tissues (A) Brain (F=2.4, df=4) (B) Kidney (F=48.5, df=4) (C) Liver (F=11.5, df=4) (D) Placenta (F=18.5, df=3), fetal tissues (E) (i) Brain (male) (F=5.2, df=3) (ii) Brain (female) (F=4.1, df=3) (F) (i) Kidney (male) (F=0.05, df=2) (ii) Kidney (female) (F=8.08, df=2) (G) (i) Liver (male) (F=15.2, df=3) (ii) Liver (female) (F=6.0, df=3)

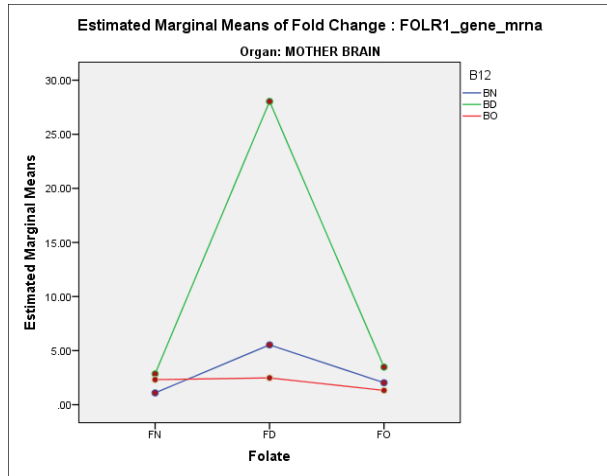

(A)

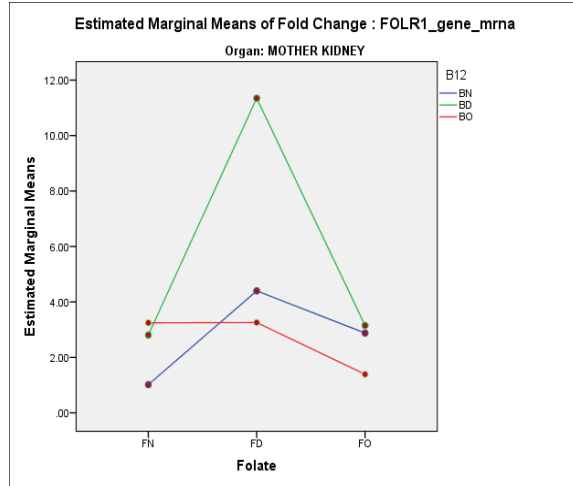

(B)

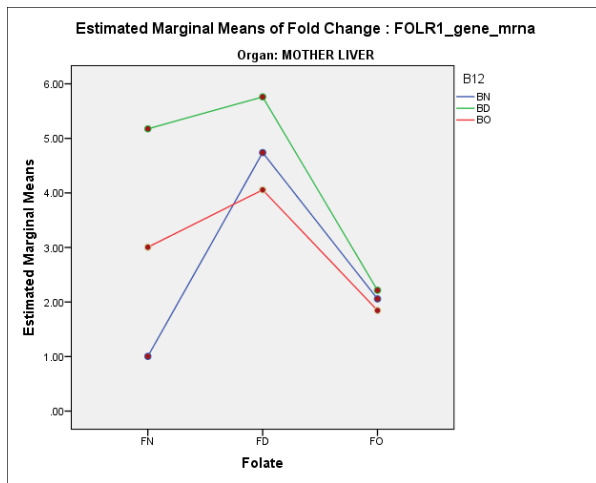

(C)

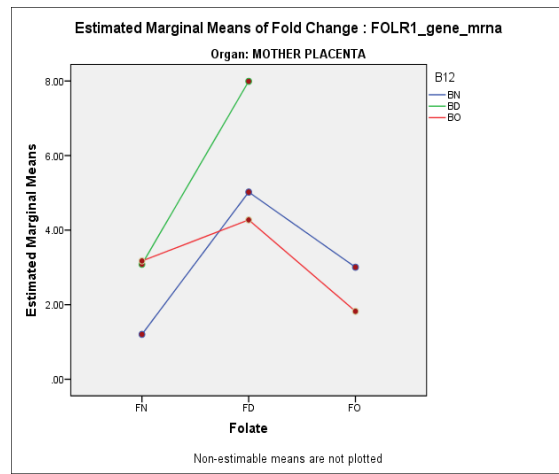

(D)

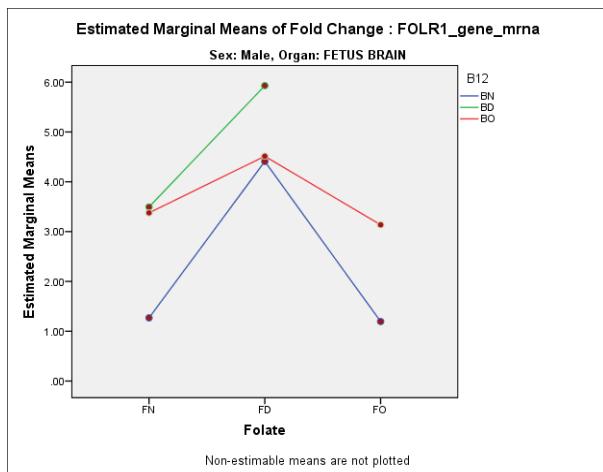

E (i)

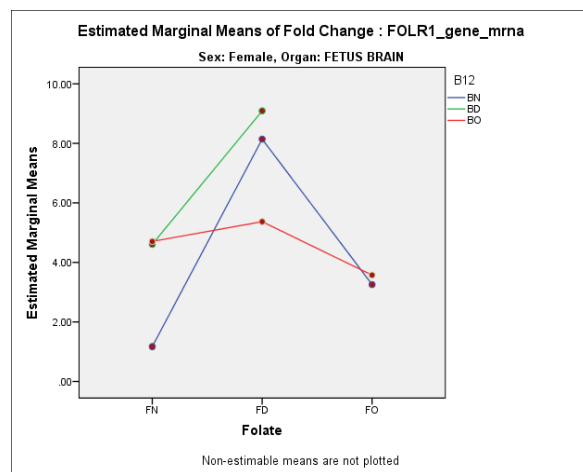

E (ii)



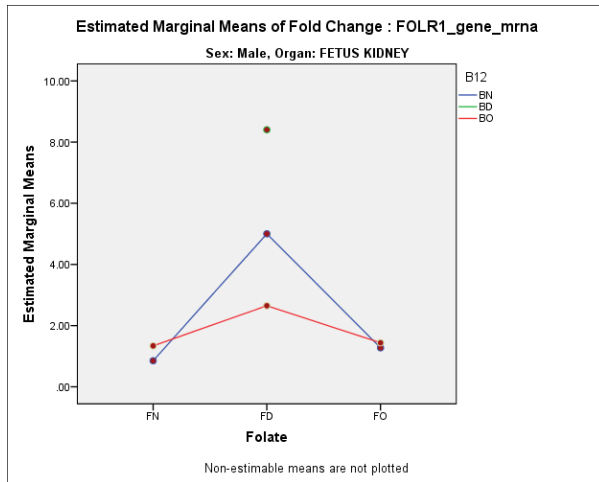

F (i)

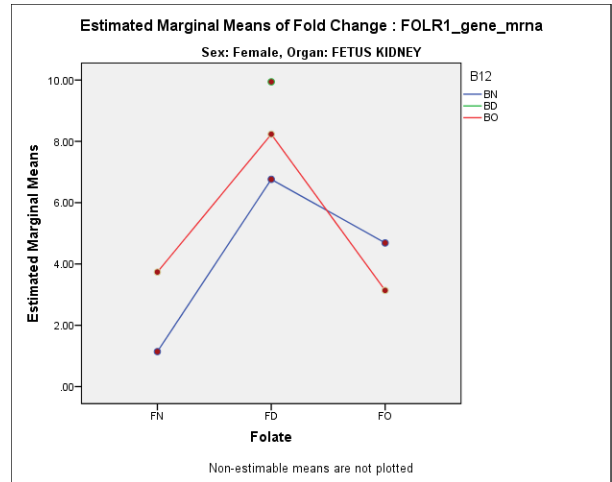

F (ii)

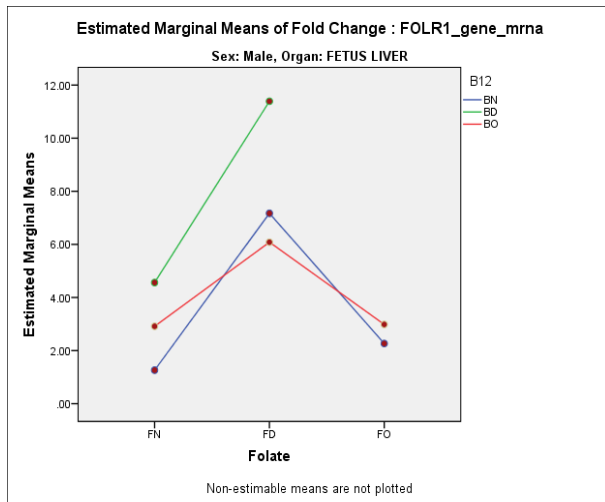

G (i)

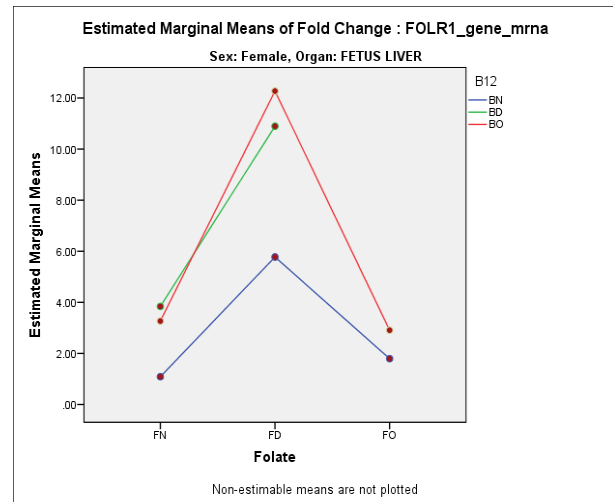

G (ii)

Supplementary figure 5: Profile plots of mRNA expression of FOLR1 in maternal tissues (A) Brain (F=286.2, df=4) (B) Kidney (F=74.1, df=4) (C) Liver (F=11.3, df=4) (D) Placenta (F=41.1, df=3), fetal tissues (E) (i) Brain (male) (F=1.8, df=3) (ii) Brain (female) (F=10.0, df=3) (F) (i) Kidney (male) (F=7.8, df=2) (ii) Kidney (female) (F=11.2, df=2) (G) (i) Liver (male) (F=5.4, df=3) (ii) Liver (female) (F=9.4, df=3)

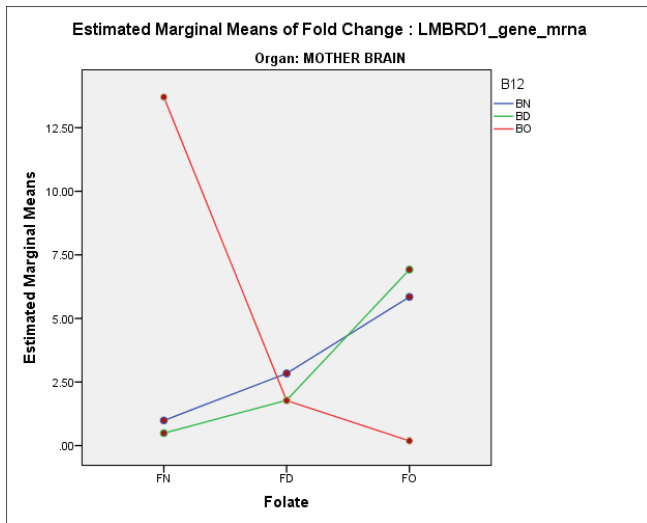

(A)

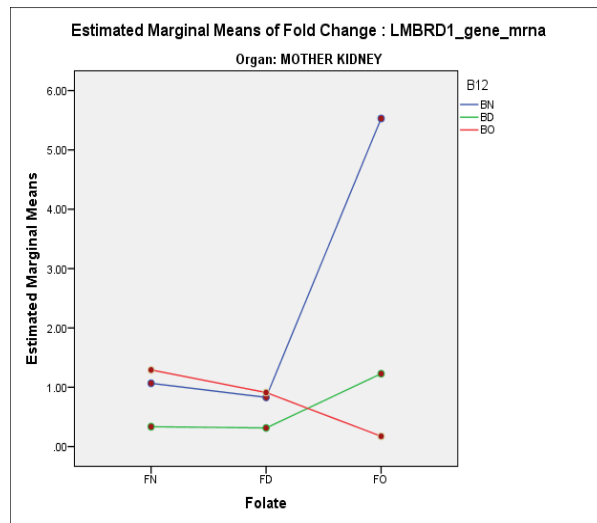

(B)

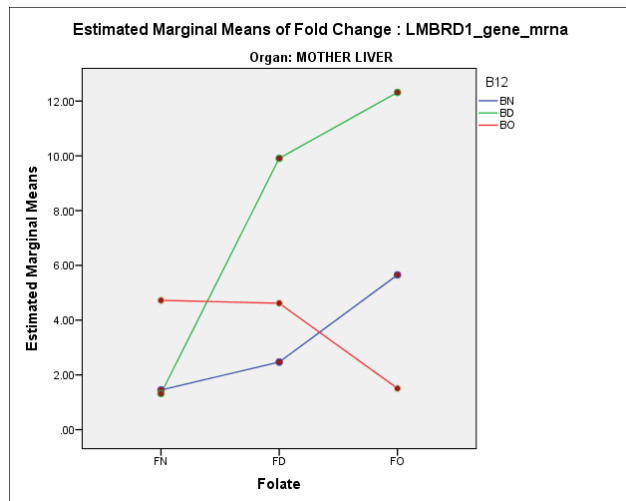

(C)

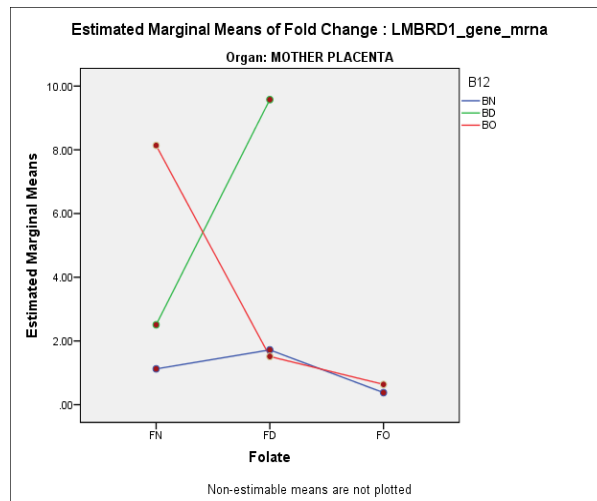

(D)

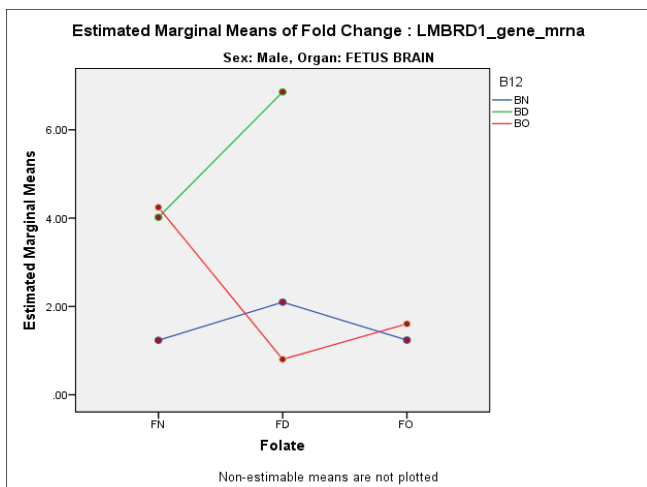

E (i)

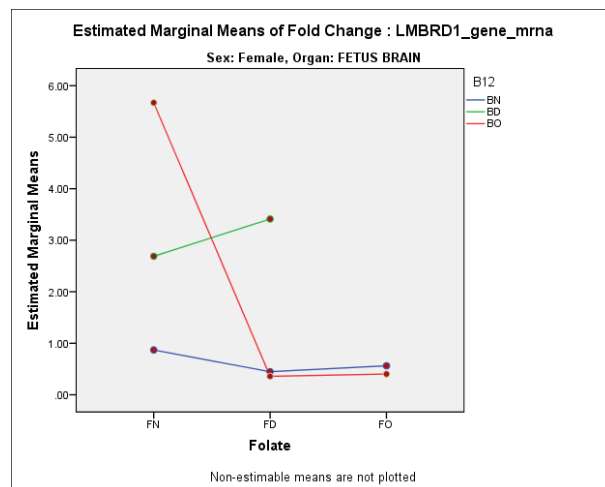

E (ii)

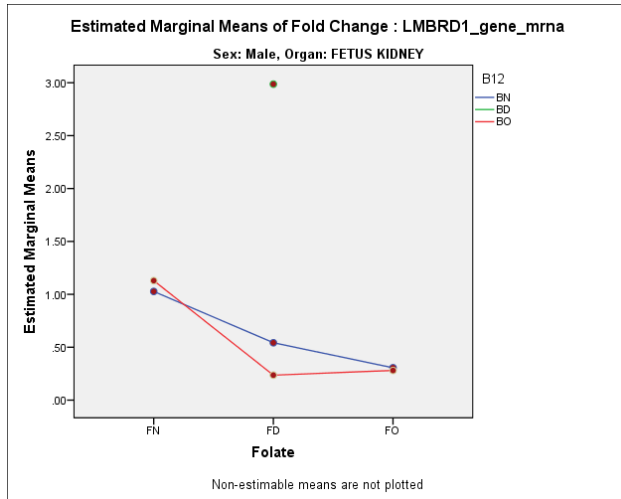

F (i)

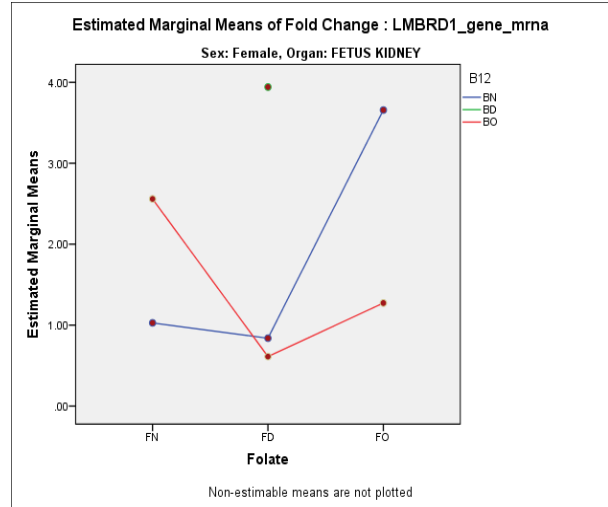

F (ii)

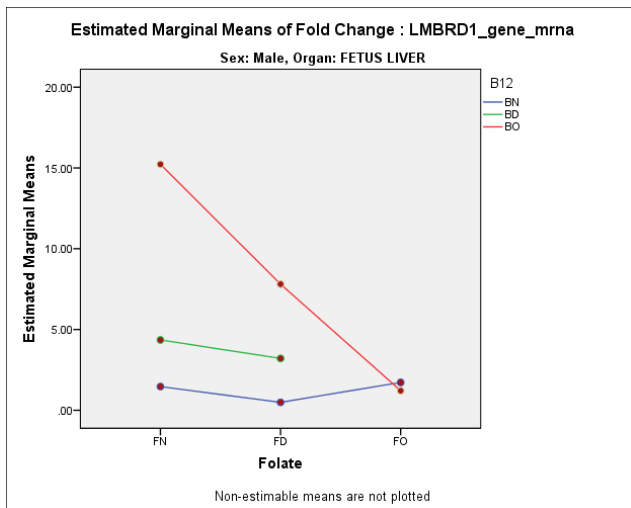

G (i)

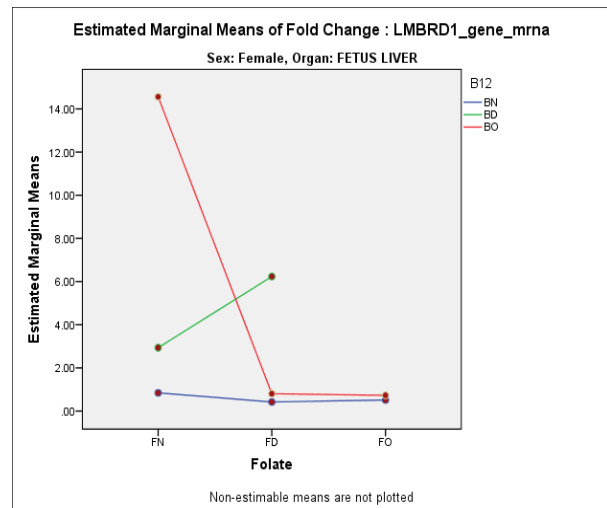

G (ii)

Supplementary figure 6: Profile plots of mRNA expression of LMBRD1 in maternal tissues (A) Brain (F=1056.8, df=4) (B) Kidney (F=83.6, df=4) (C) Liver (F=24.0, df=4) (D) Placenta (F=150.2, df=3), fetal tissues (E) (i) Brain (male) (F=15.5, df=3) (ii) Brain (female) (F=35.4, df=3) (F) (i) Kidney (male) (F=0.82, df=2) (ii) Kidney (female) (F=23.9, df=2) (G) (i) Liver (male) (F=132.9, df=3) (ii) Liver (female) (F=272.4, df=3)

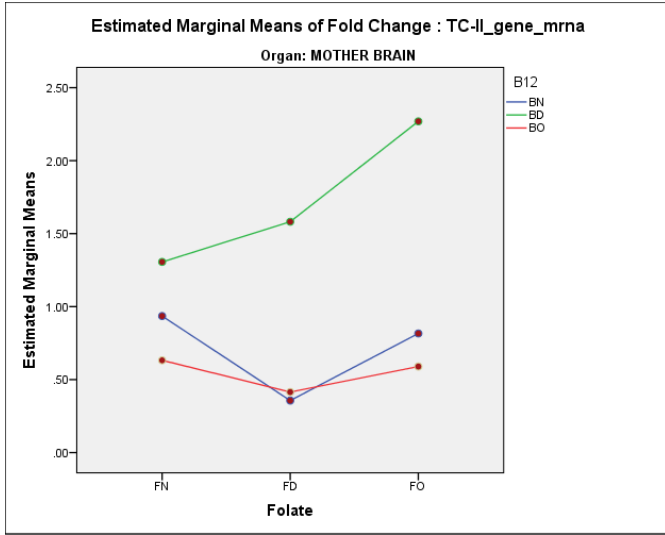

(A)

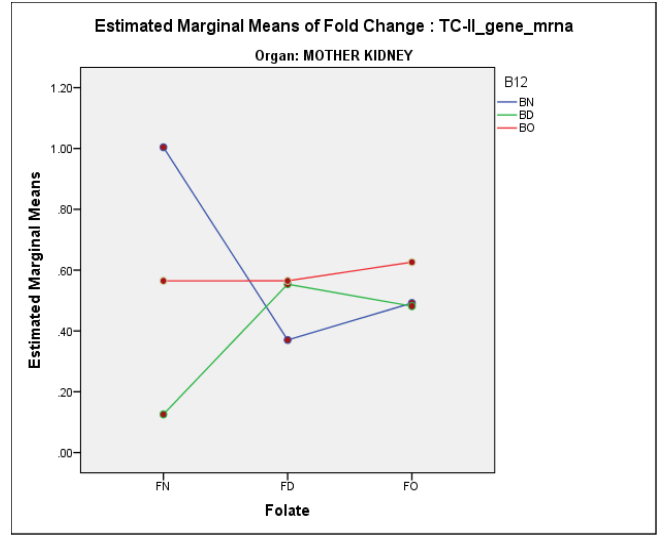

(B)

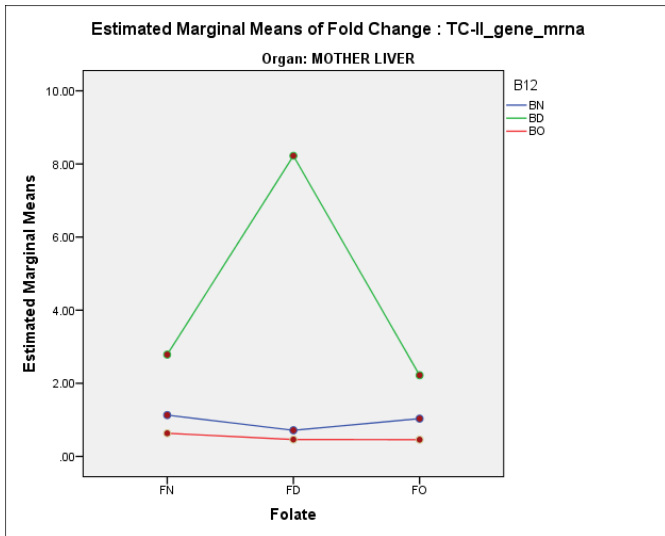

(C)

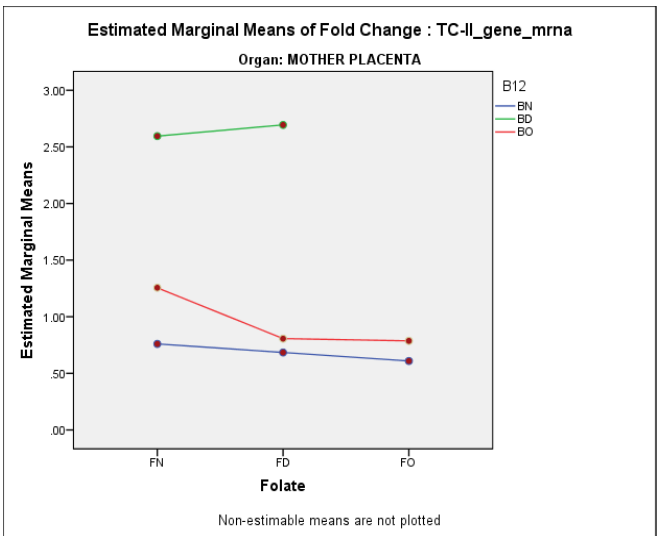

(D)

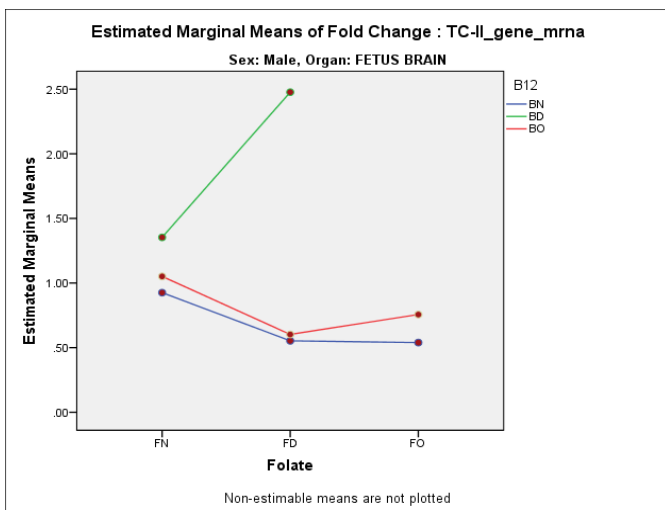

E (i)

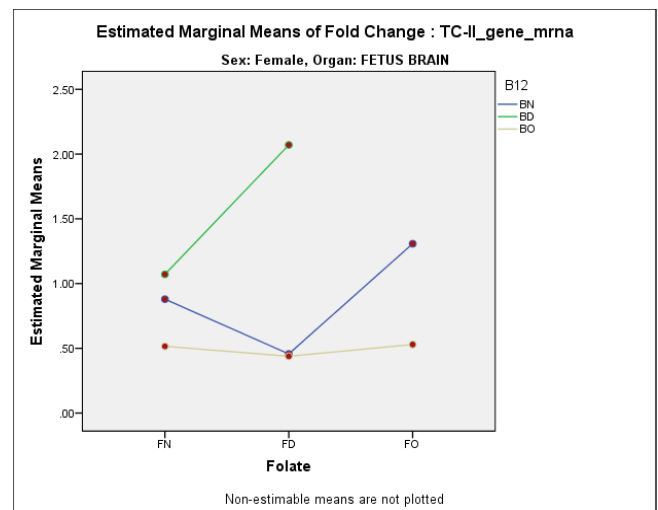

E (ii)

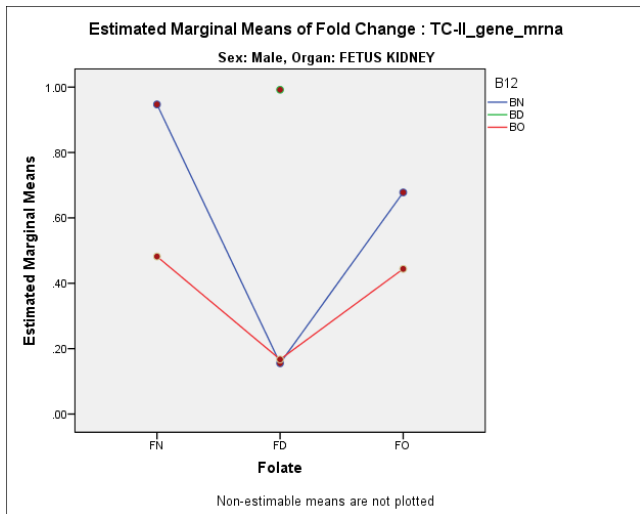

F (i)

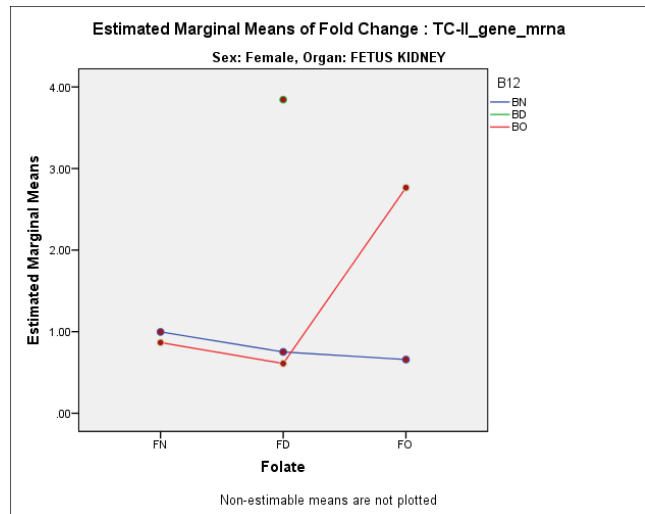

F (ii)

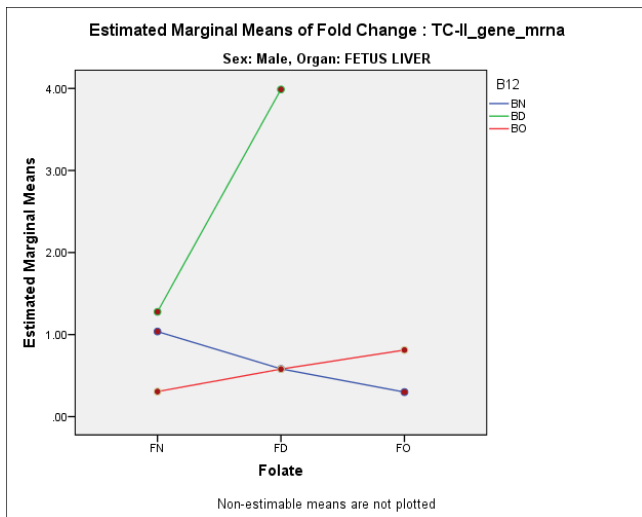

G (i)

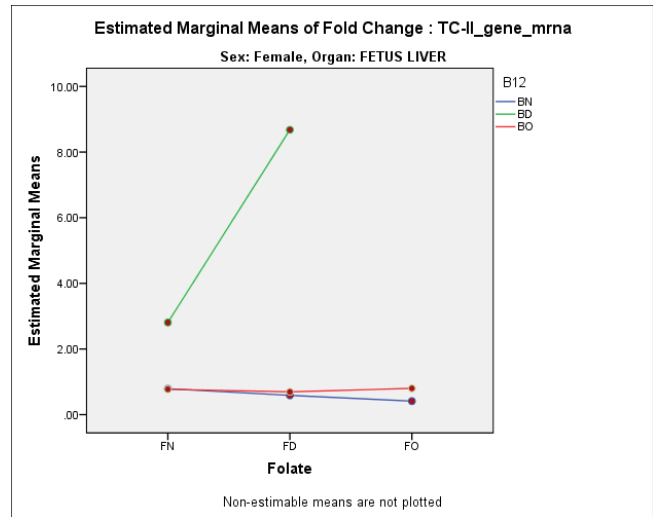

G (ii)

Supplementary figure 7: Profile plots of mRNA expression of TC-II in maternal tissues (A) Brain (F=3.7, df=4) (B) Kidney (F=12.4, df=4) (C) Liver (F=66.6, df=4) (D) Placenta (F=1.76, df=3), fetal tissues (E) (i) Brain (male) (F=18.8, df=3) (ii) Brain (female) (F=14.0, df=3) (F) (i) Kidney (male) (F=5.1, df=2) (ii) Kidney (female) (F=8.5, df=2) (G) (i) Liver (male) (F=27.5, df=3) (ii) Liver (female) (F=50.6, df=3)

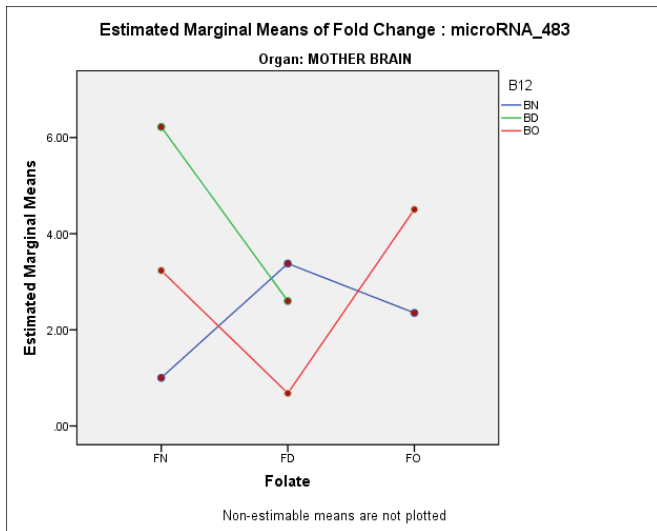

(A)

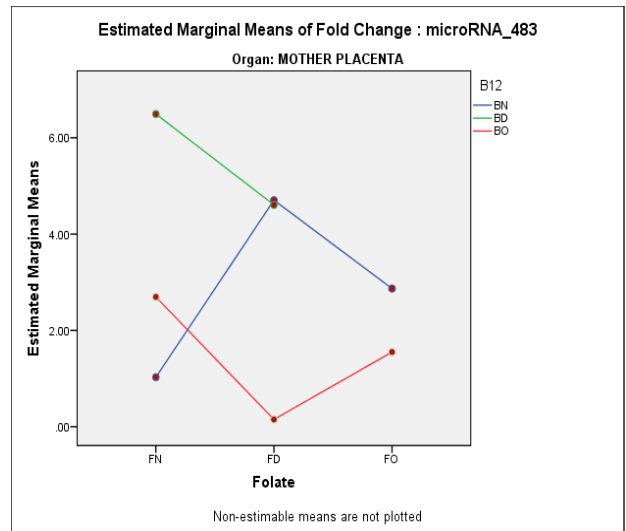

(B)

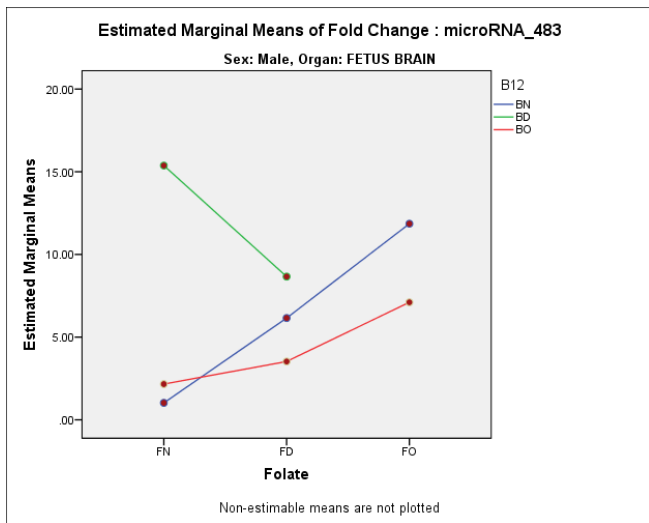

C (i)

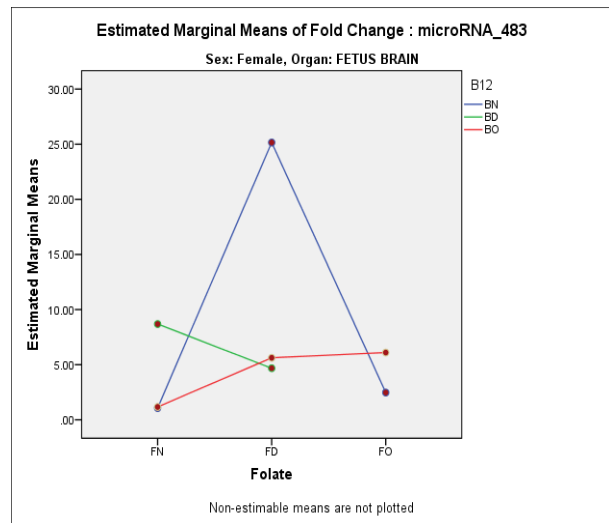

C (ii)

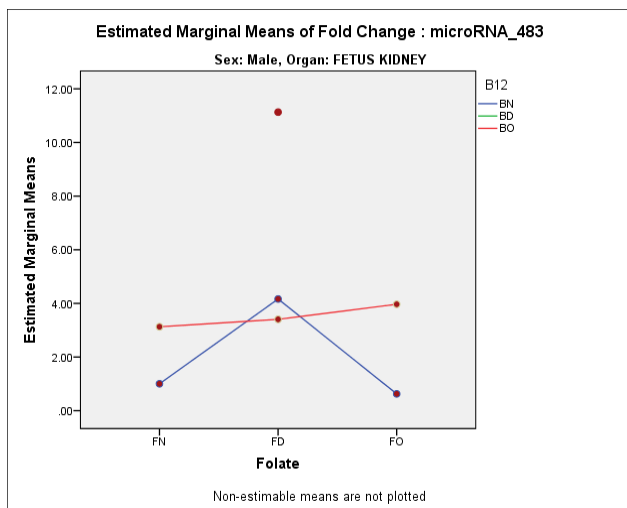

D (i)

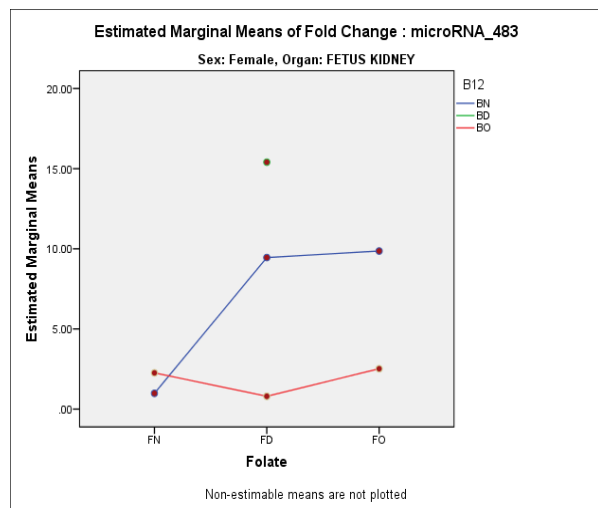

D (ii)

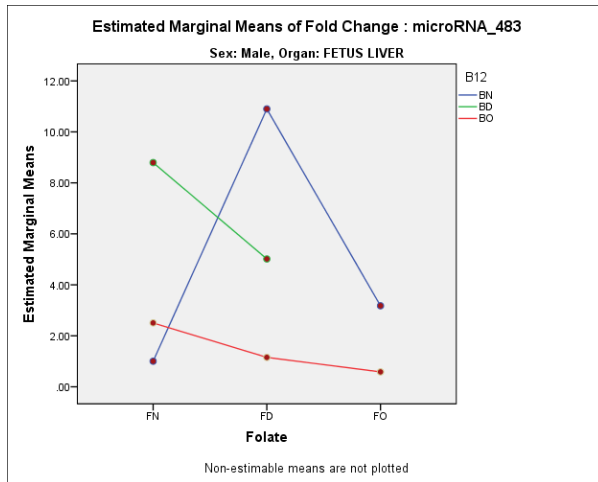

E (i)

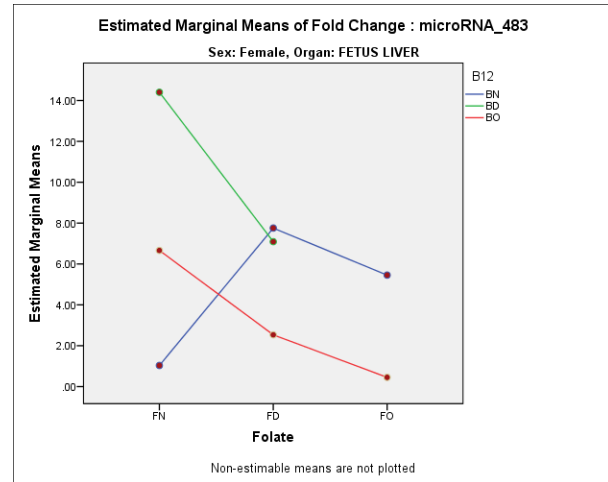

E (ii)

Supplementary figure 8: Profile plots of mRNA expression of miR483 in maternal tissues (A) Brain (F=92.3, df=3) (B) Placenta (F=152.3, df=3), fetal tissues (C) (i) Brain (male) (F=55.8, df=3) (ii) Brain (female) (F=353.3, df=3) (D) (i) Kidney (male) (F=14.7, df=2) (ii) Kidney (female) (F=101.6, df=2) (E) (i) Liver (male) (F=115.8, df=3) (ii) Liver (female) (F=97.1, df=3)

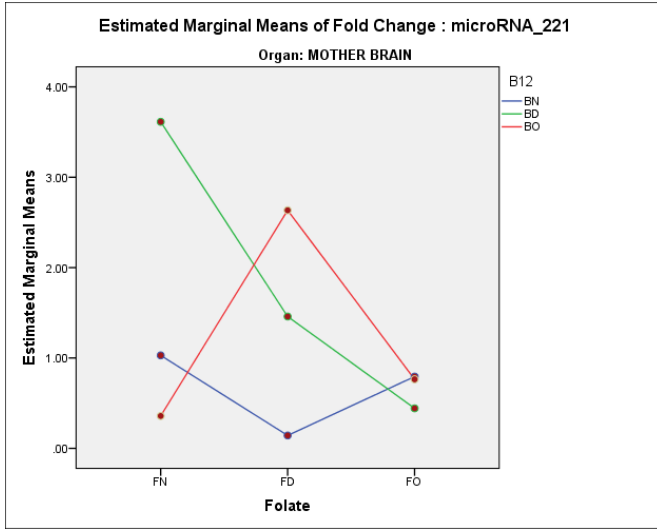

(A)

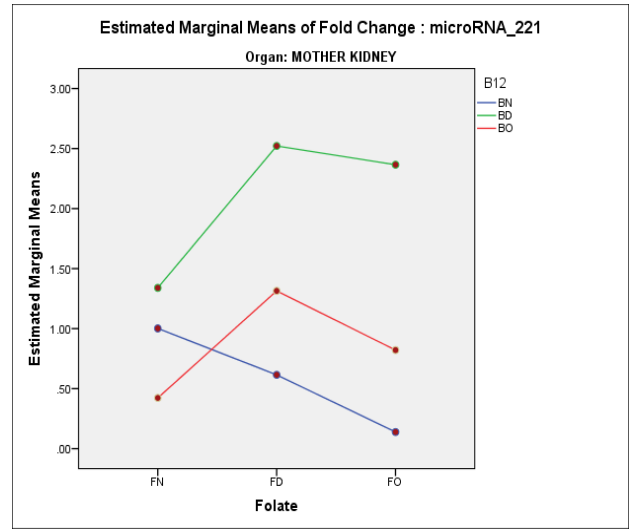

(B)

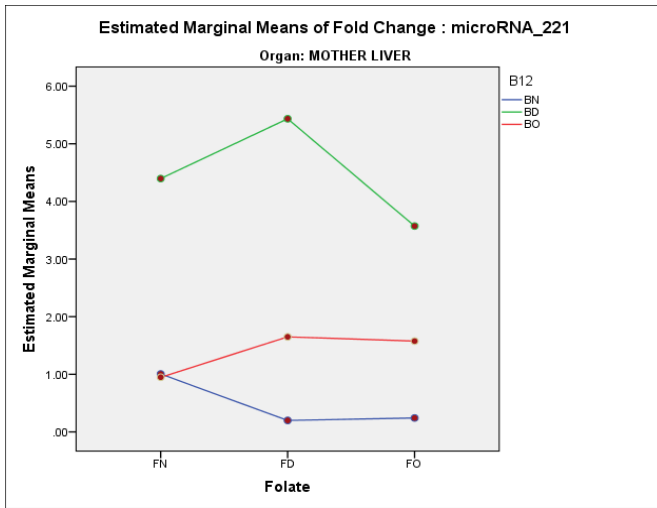

(C)

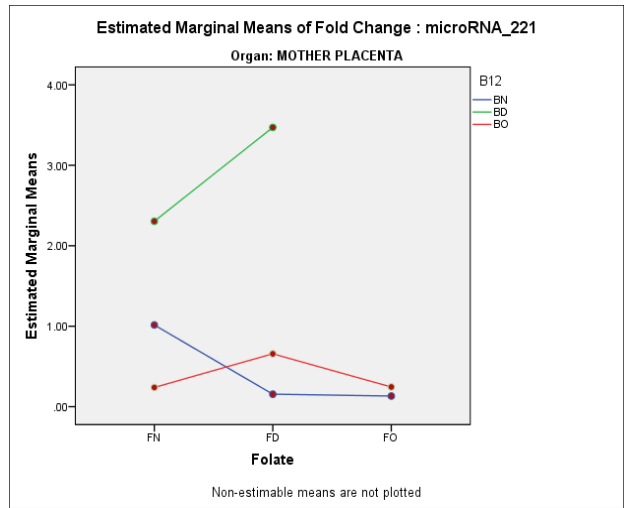

(D)

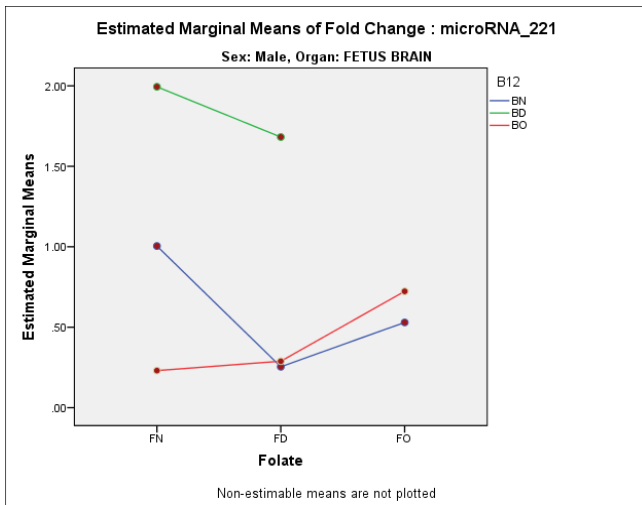

E (i)

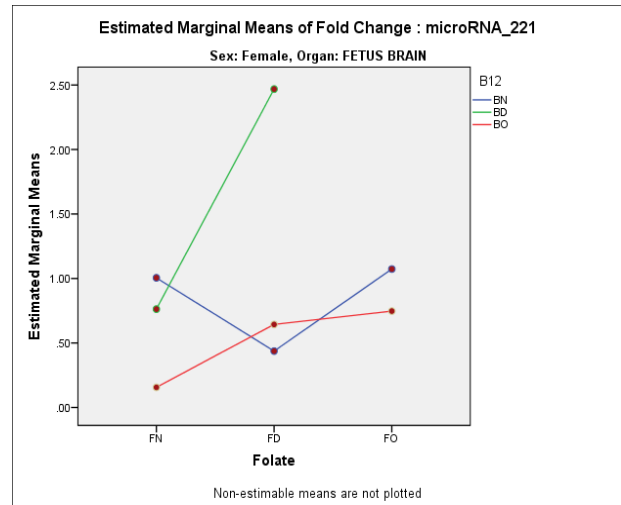

E (ii)



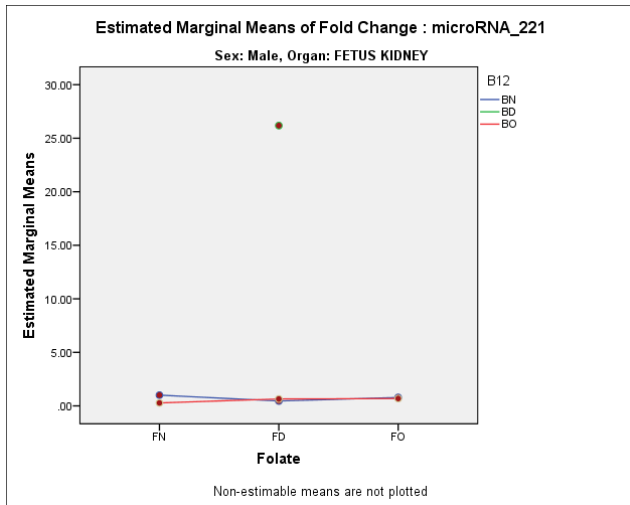

F (i)

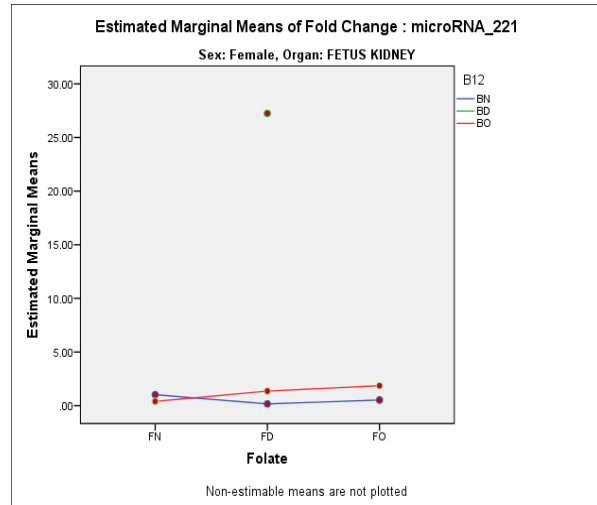

F (ii)

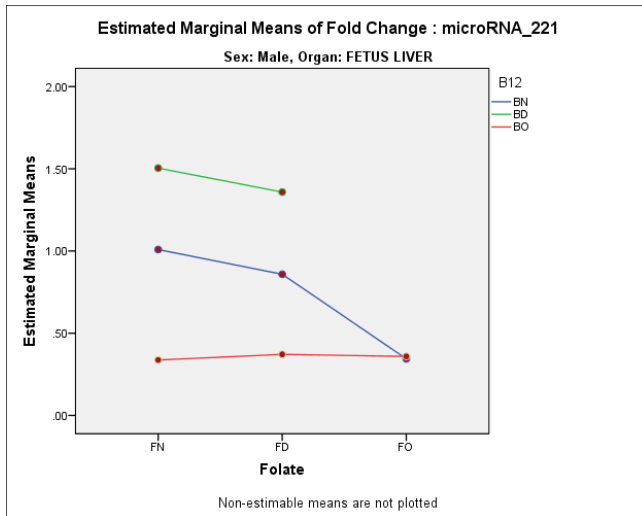

G (i)

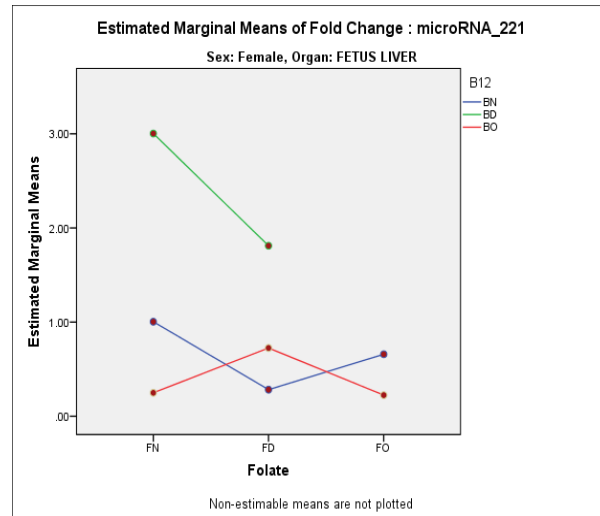

G (ii)

Supplementary figure 9: Profile plots of mRNA expression of miR221 in maternal tissues (A) Brain (F=139.6, df=4) (B) Kidney (F=6.9, df=4) (C) Liver (F=37.6, df=4) (D) Placenta (F=75.3, df=3), fetal tissues (E) (i) Brain (male) (F=6.6, df=3) (ii) Brain (female) (F=17.5, df=3) (F) (i) Kidney (male) (F=1.7, df=2) (ii) Kidney (female) (F=16.4, df=2) (G) (i) Liver (male) (F=5.7, df=3) (ii) Liver (female) (F=167.0, df=3)

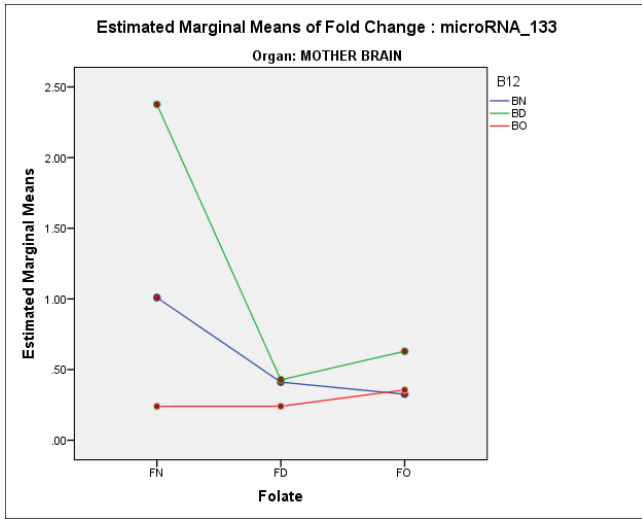

(A)

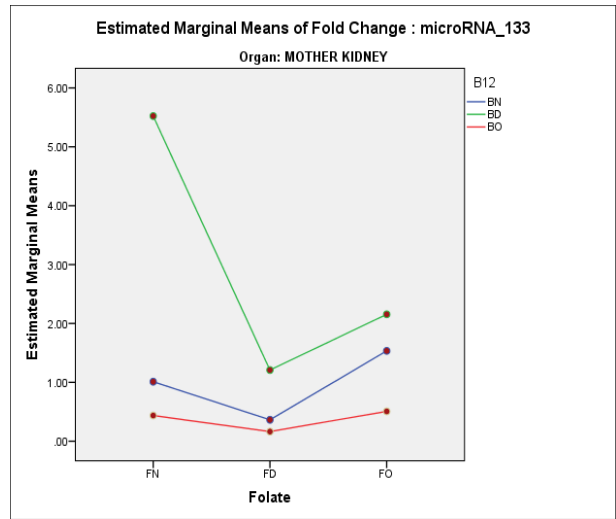

(B)

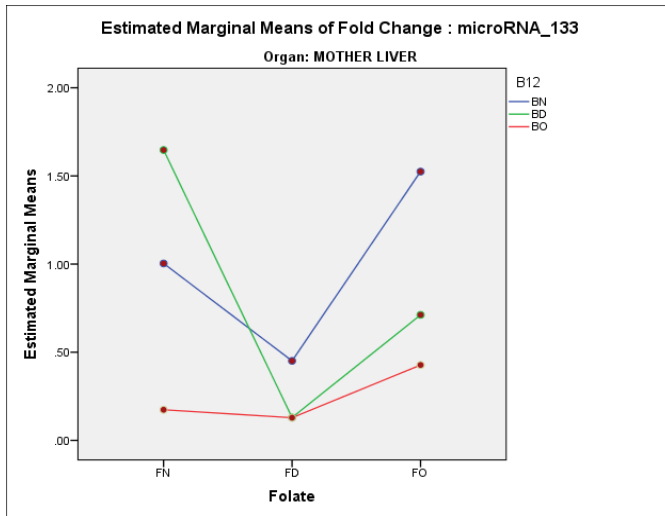

(C)

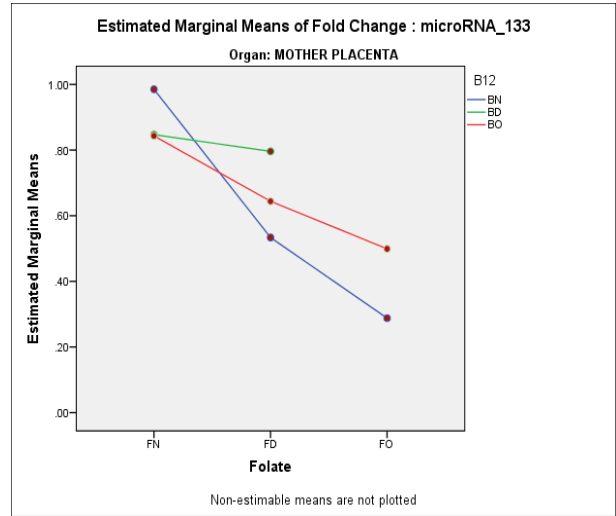

(D)

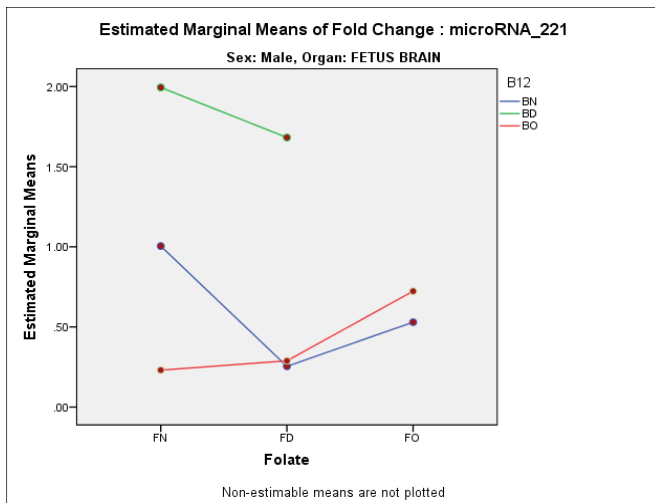

E (i)

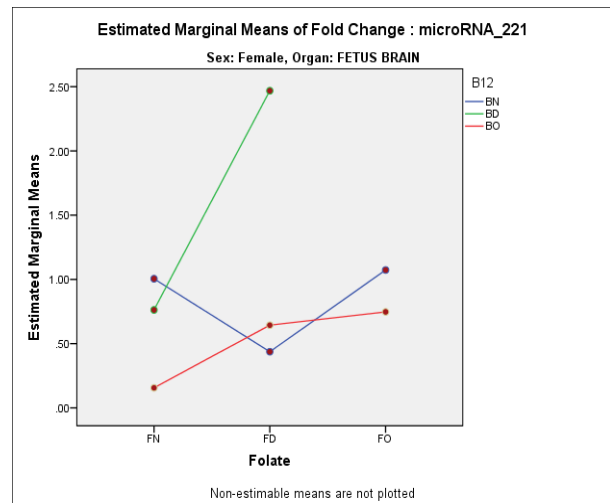

E (ii)

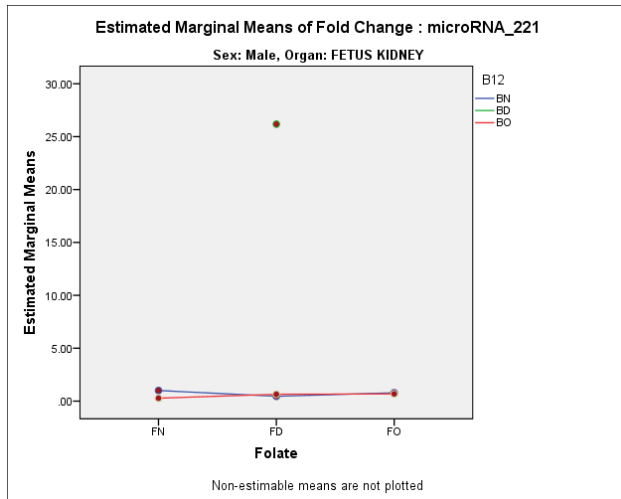

F (i)

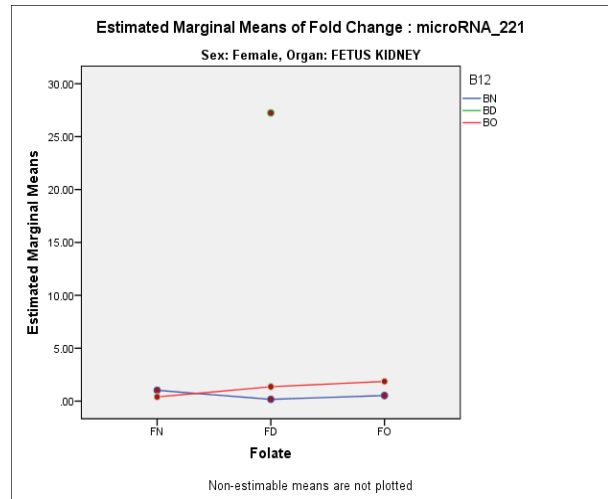

F (ii)

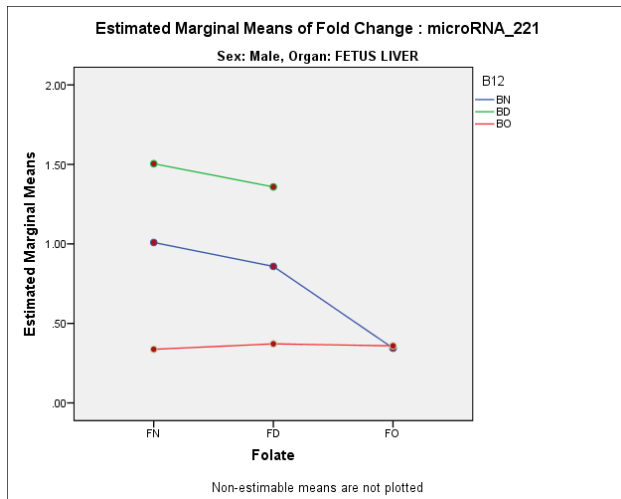

G (i)

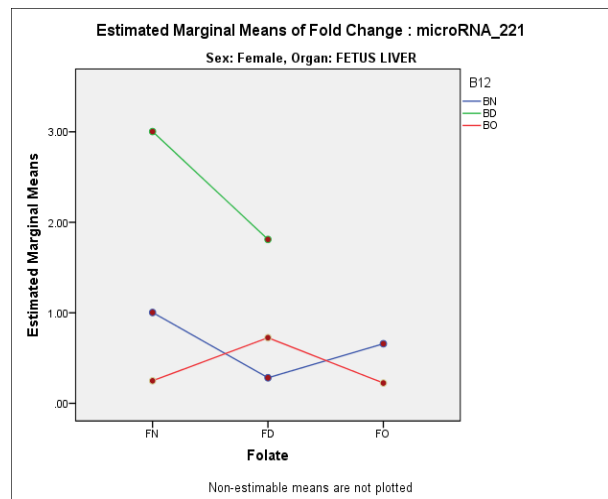

G (ii)

Supplementary figure 10: Profile plots of mRNA expression of miR133 in maternal tissues (A) Brain (F=38.7, df=4) (B) Kidney (F=68.4, df=4) (C) Liver (F=24.0, df=4) (D) Placenta (F=5.3, df=3), fetal tissues (E) (i) Brain (male) (F=6.6, df=3) (ii) Brain (female) (F=17.5, df=3) (F) (i) Kidney (male) (F=1.71, df=2) (ii) Kidney (female) (F=16.4, df=2) (G) (i) Liver (male) (F=5.7, df=3) (ii) Liver (female) (F=167.0, df=3)

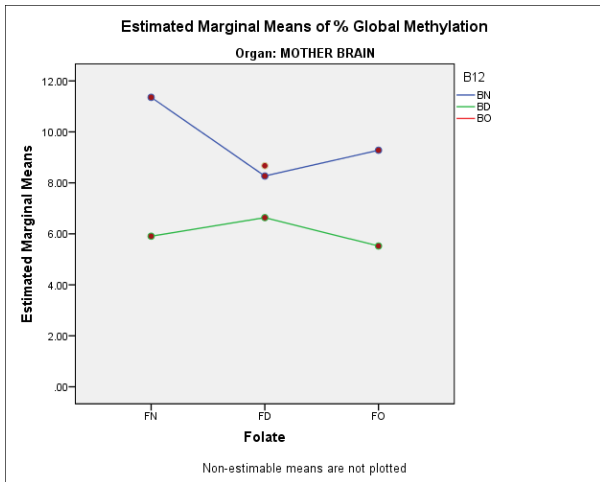

(A)

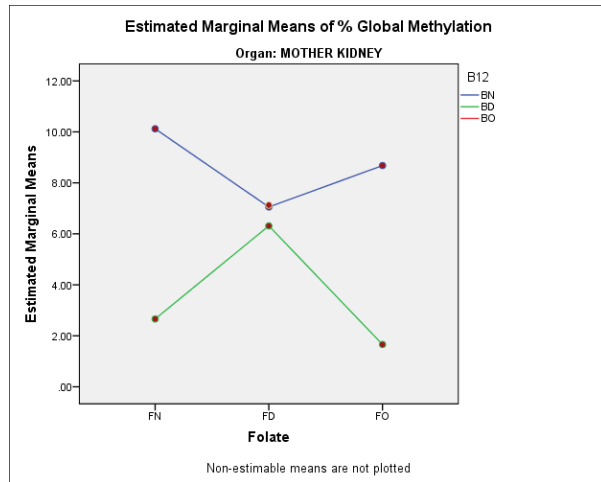

(B)

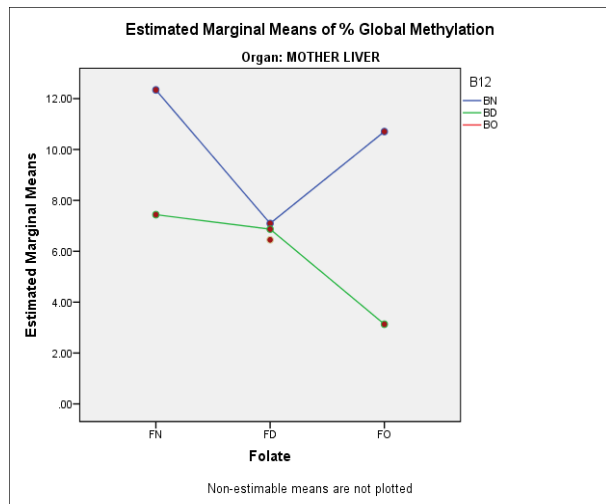

(C)

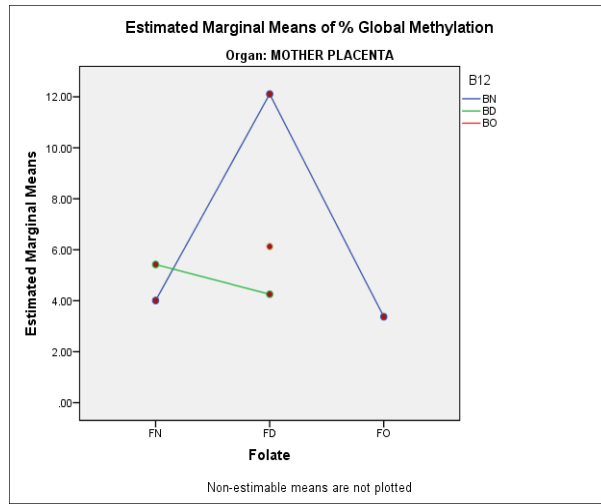

(D)

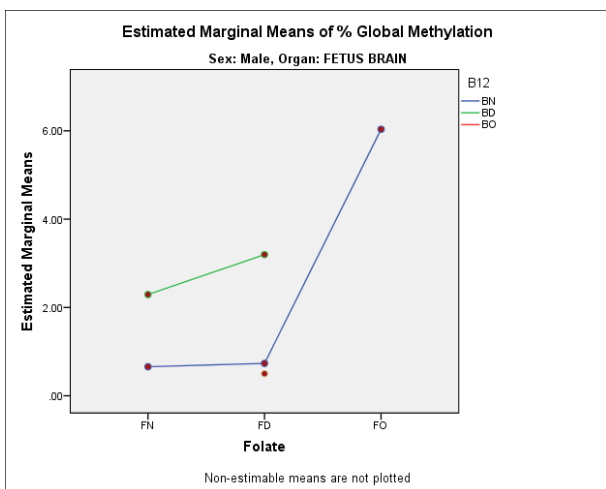

E (i)

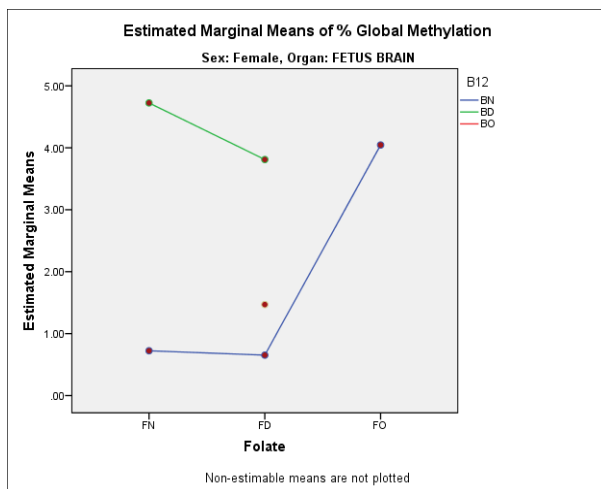

E (ii)

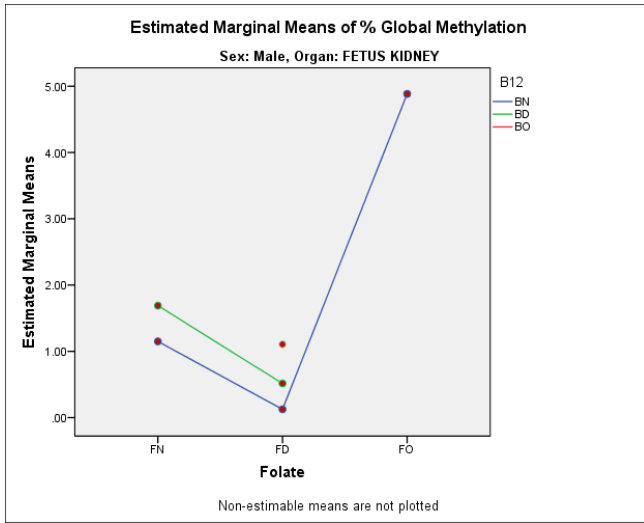

F (i)

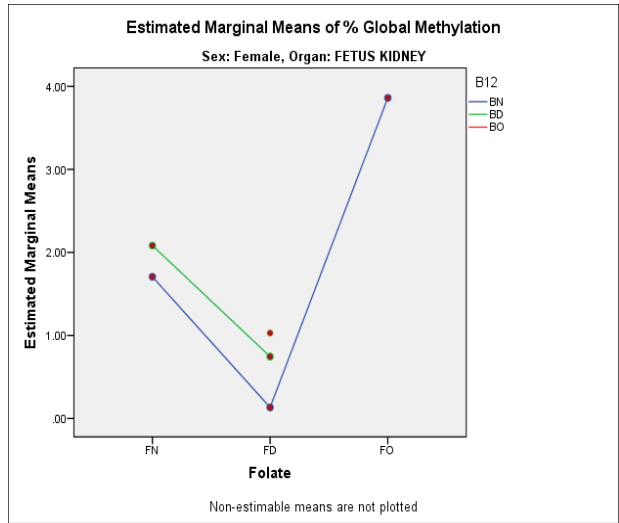

F (ii)

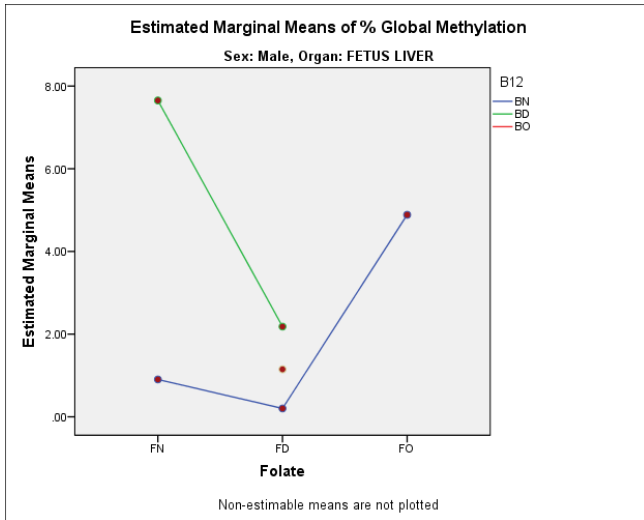

G (i)

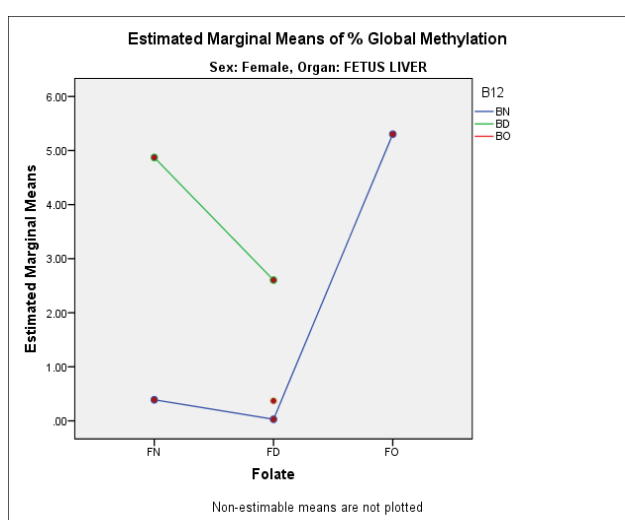

G (ii)

Supplementary figure 11: Profile plots of global DNA methylation in maternal tissues (A) Brain ( $F=7.3$ ,  $df=2$ ) (B) Kidney ( $F=44.1$ ,  $df=2$ ) (C) Liver ( $F=32.5$ ,  $df=2$ ) (D) Placenta ( $F=105.0$ ,  $df=1$ ), fetal tissues (E) (i) Brain (male) ( $F=7.0$ ,  $df=1$ ) (ii) Brain (female) ( $F=2.9$ ,  $df=1$ ) (F) (i) Kidney (male) ( $F=0.16$ ,  $df=1$ ) (ii) Kidney (female) ( $F=0.19$ ,  $df=1$ ) (G) (i) Liver (male) ( $F=65.3$ ,  $df=1$ ) (ii) Liver (female) ( $F=17.7$ ,  $df=1$ )

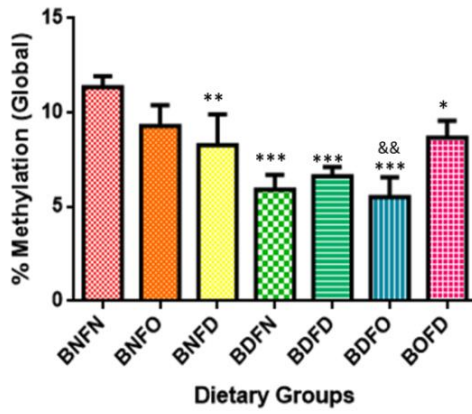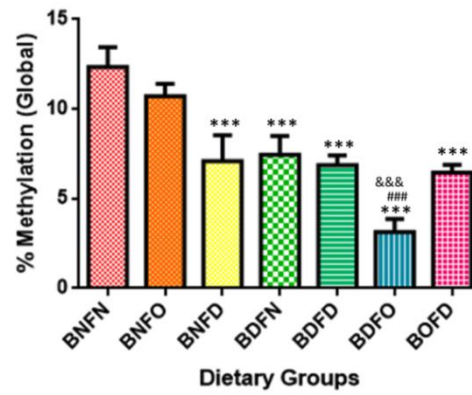

(A)

(B)

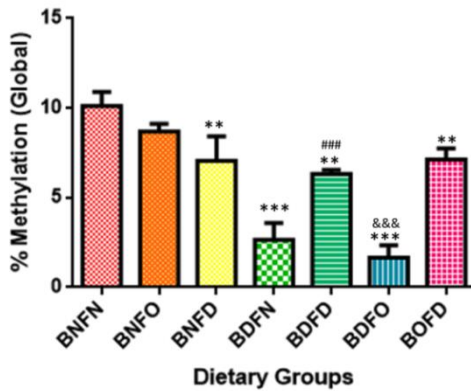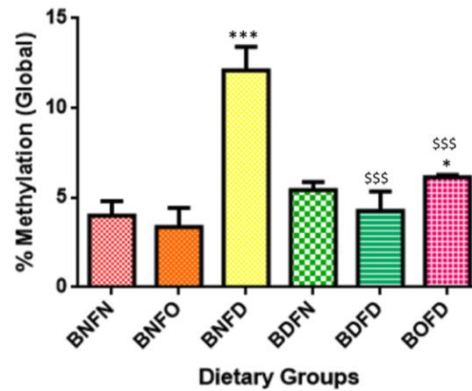

(C)

(D)

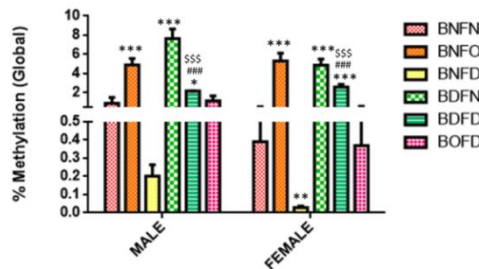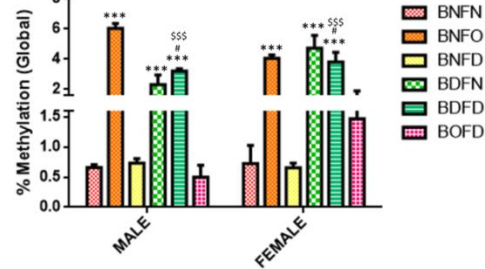

(E)

(F)

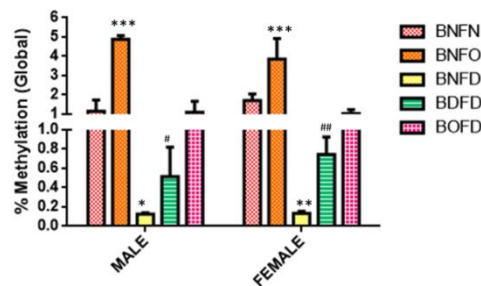

(G)

**Supplementary figure 12: Percentage global DNA methylation in maternal tissues (A) Brain (F= 17.22, df=6) (B) Liver (F= 42.42, df=6) (C) Kidney (F= 58.55, df=6) (D) Placenta (F= 50.40, df=5), fetal tissues (E) Liver (Male) (F=95.1, df=5), (Female) (F=110.1, df=5) (F) Brain (Male) (F=191.3, df=5), (Female) (F=55.1, df=5) (G) Kidney (Male) (F=83.5, df=5), (Female) (F=23.4, df=5) \*p < 0.05, \*\*p < 0.01, \*\*\*p < 0.001 vs BNFN, #p < 0.05, ###p < 0.01, ####p < 0.001 vs BDFN, \$p < 0.05, \$\$p < 0.01, \$\$\$p < 0.001 vs BNFD and &p < 0.05, &&p < 0.01, &&&p < 0.001 vs BNFO. The data is presented as mean ± SD. (N=4)**

B12 normal folate normal (BNFN), B12 normal folate over-supplemented (BNFO), B12 normal folate deficient (BNFD), B12 deficient folate normal (BDFN), B12 deficient folate over-supplemented (BDFO), B12 deficient folate deficient (BDFD), B12 over-supplemented folate normal (BOFN), B12 over-supplemented folate over-supplemented (BOFO), B12 over-supplemented folate deficient (BOFD)

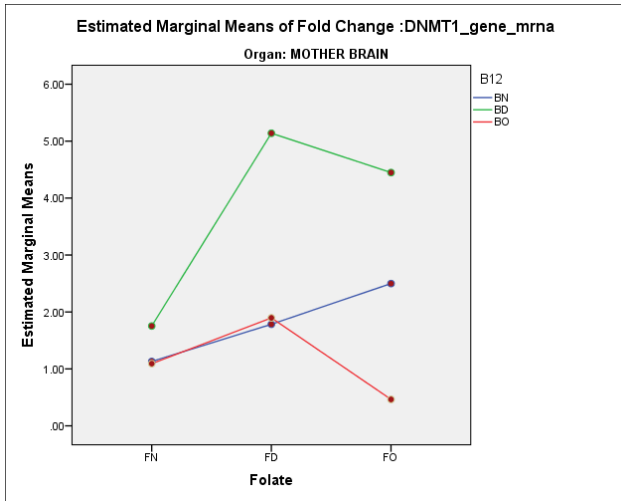

(A)

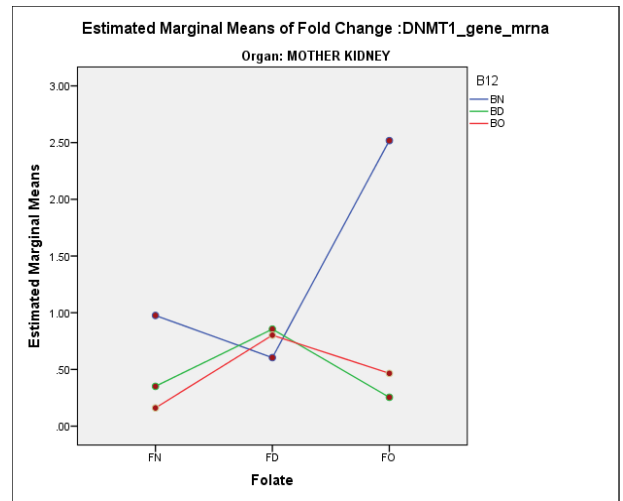

(B)

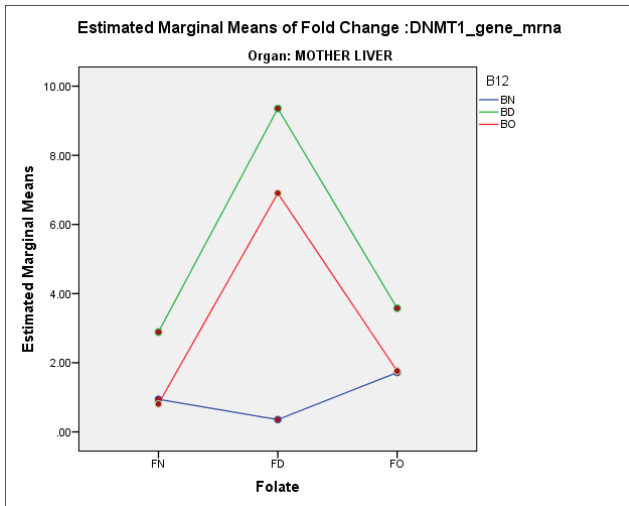

(C)

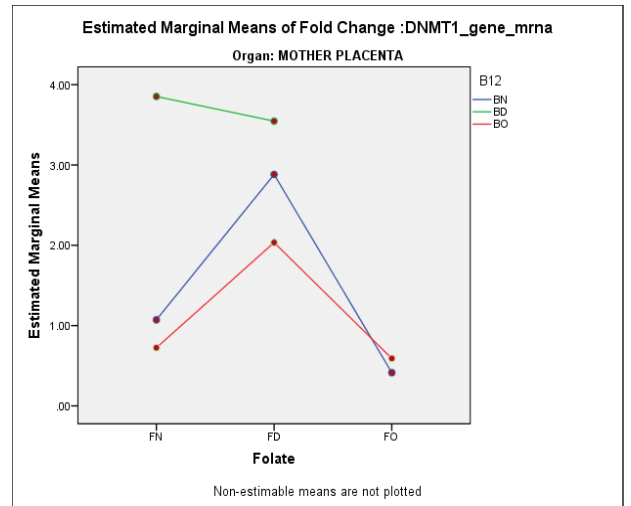

(D)

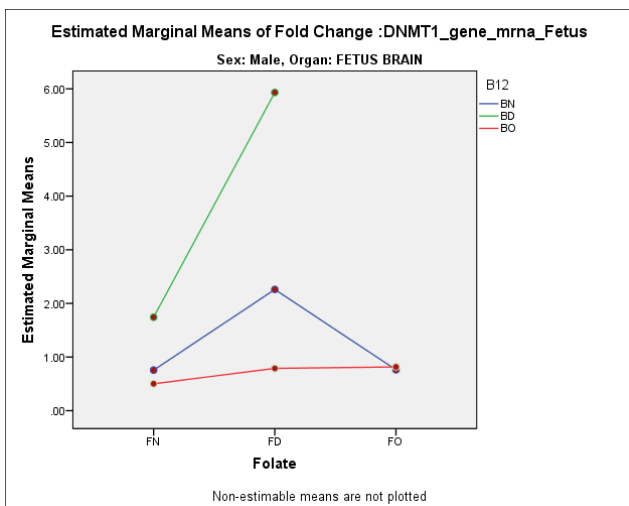

E (i)

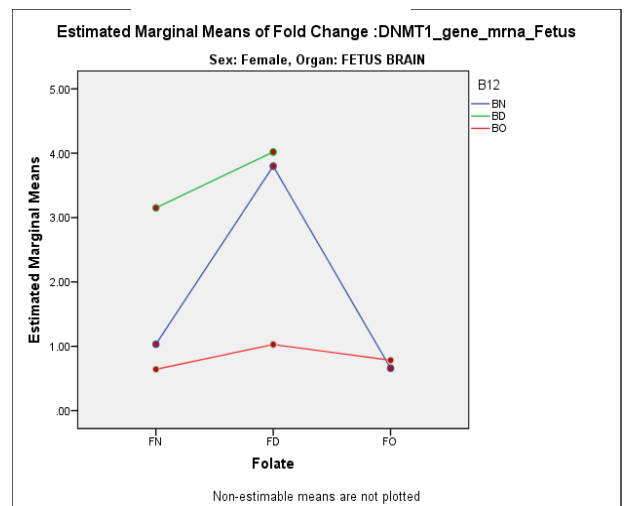

E (ii)

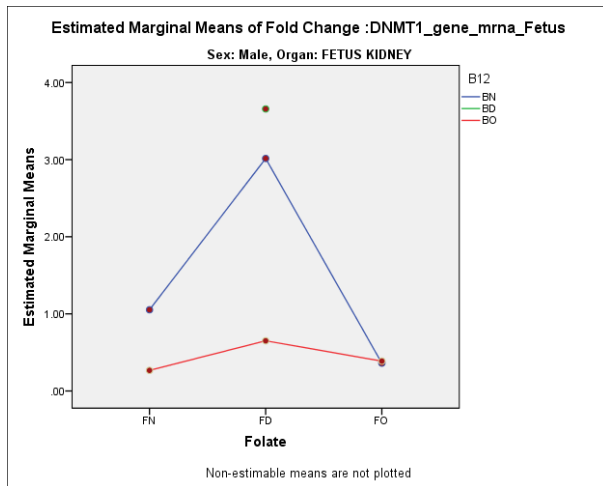

F (i)

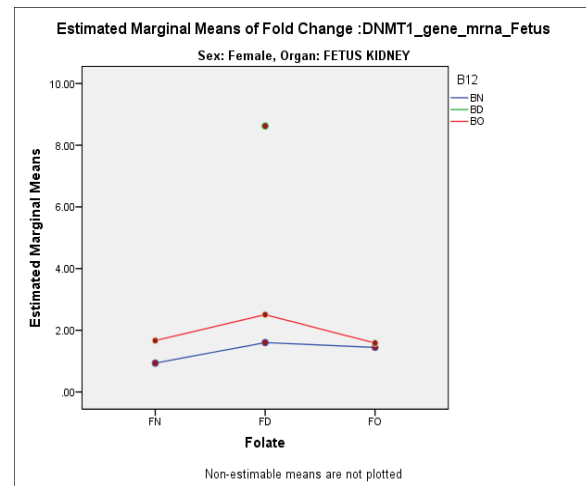

F (ii)

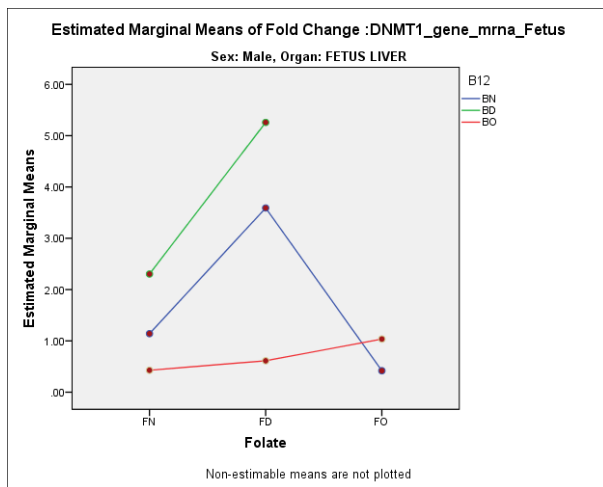

G (i)

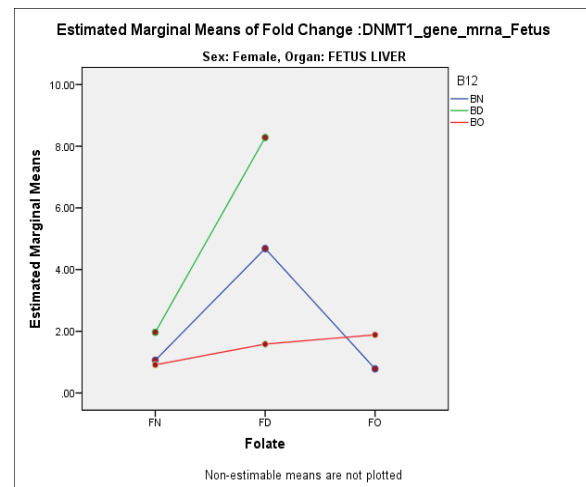

G (ii)

Supplementary figure 13: Profile plots of mRNA expression of DNMT1 in maternal tissues (A) Brain (F=4.3, df=4) (B) Kidney (F=62.7, df=4) (C) Liver (F=20.7, df=4) (D) Placenta (F=9.3, df=3), fetal tissues (E) (i) Brain (male) (F=13.8, df=3) (ii) Brain (female) (F=6.8, df=3), (F) (i) Kidney (male) (F=6.9, df=2) (ii) Kidney (female) (F=0.19, df=2) (G) (i) Liver (male) (F=9.2, df=3) (ii) Liver (female) (F=17.1, df=3)



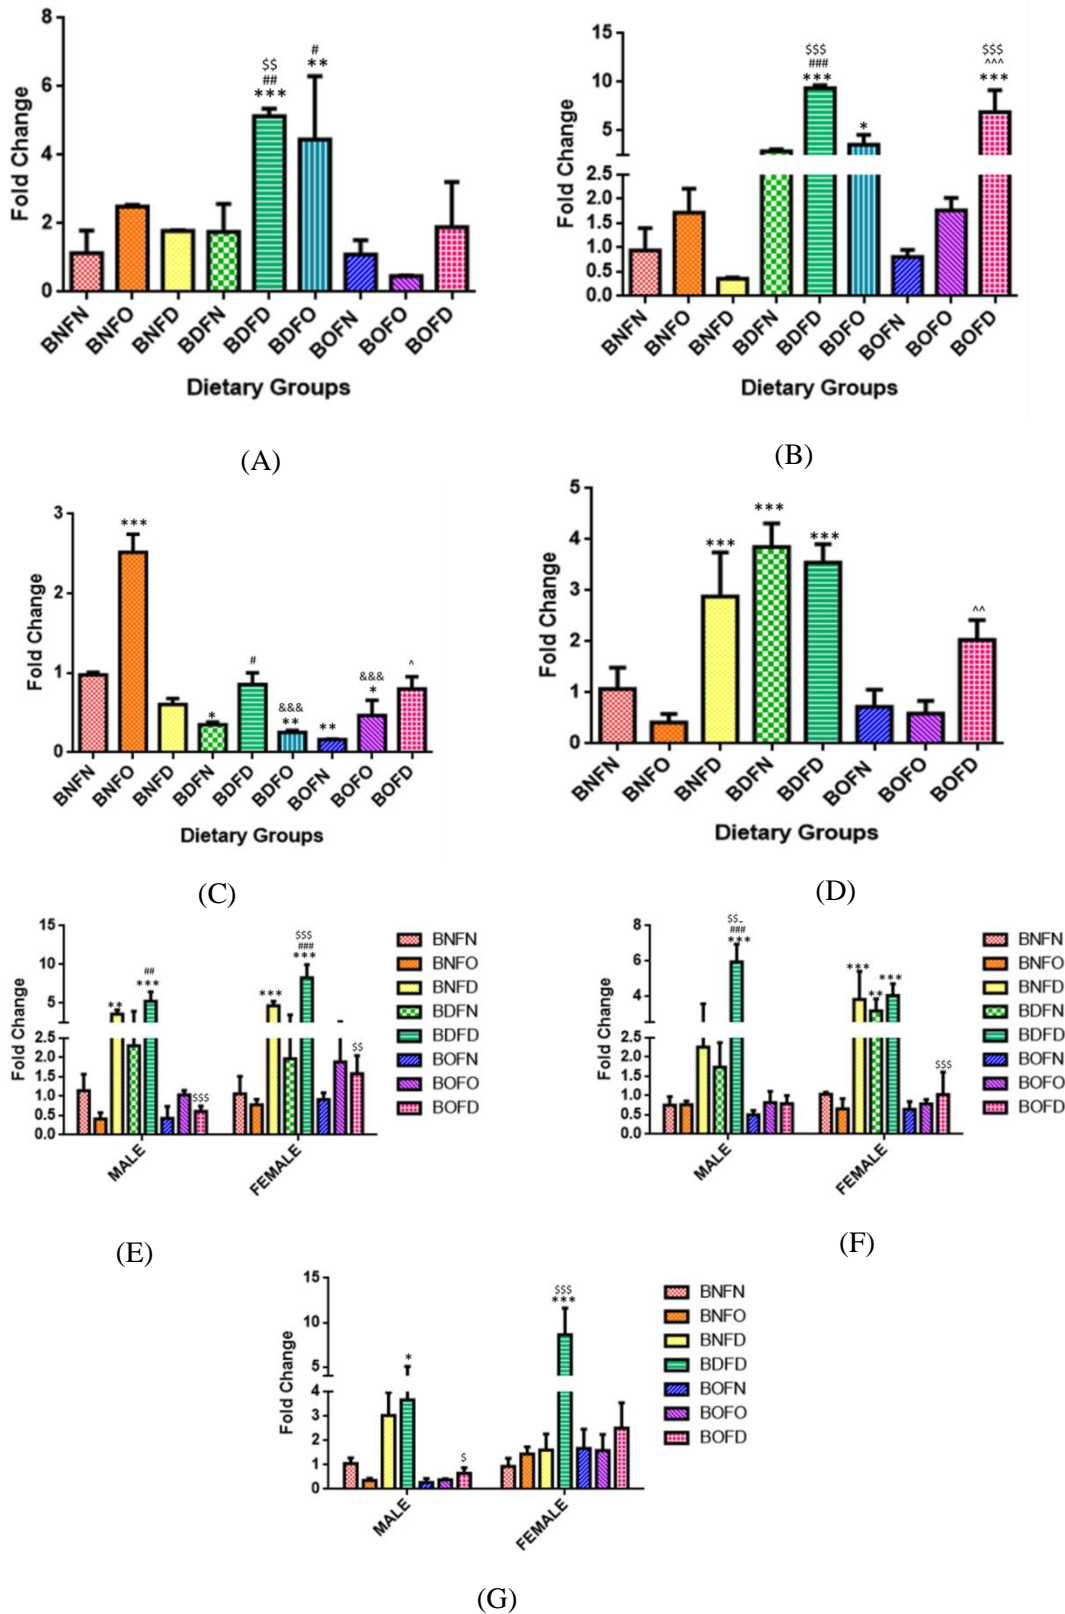

**Supplementary figure 14: Fold change in mRNA of DNMT1 gene in maternal tissues (A) Brain (F= 10.16, df=8) (B) Liver (F= 37.14, df= 8) (C) Kidney (F= 64.60, df=8) (D) Placenta (F= 38.09, df=7), fetal tissues (E) Liver (Male) (F=20.4,df=7), (Female) (F=33.1, df=7) Brain (Male) (F=32.1,df=7), (Female) (F=17.9, df=7) (G) Kidney (Male) (F=18.5,df=6), (Female) (F=17.2, df=6) normalized with GAPDH. \*p < 0.05, \*\*p < 0.01, \*\*\*p < 0.001 vs BNFN, #p < 0.05, ###p<0.01, ####p < 0.001 vs BDFN, ^p < 0.05, ^^p<0.01, ^^p < 0.001 vs BOFN, \$p < 0.05, \$\$p<0.01, \$\$\$ p < 0.001 vs BNFD and &p < 0.05, &&p<0.01, &&& p < 0.001 vs BNFO. The data is presented as mean ± SD. (N=4)**

B12 normal folate normal (BNFN), B12 normal folate over-supplemented (BNFO), B12 normal folate deficient (BNFD), B12 deficient folate normal (BDFN), B12 deficient folate over-supplemented (BDOF), B12 deficient folate deficient (BDFD), B12 over-supplemented folate normal (BOFN), B12 over-supplemented folate over-supplemented (BOFO), B12 over-supplemented folate deficient (BOFD)

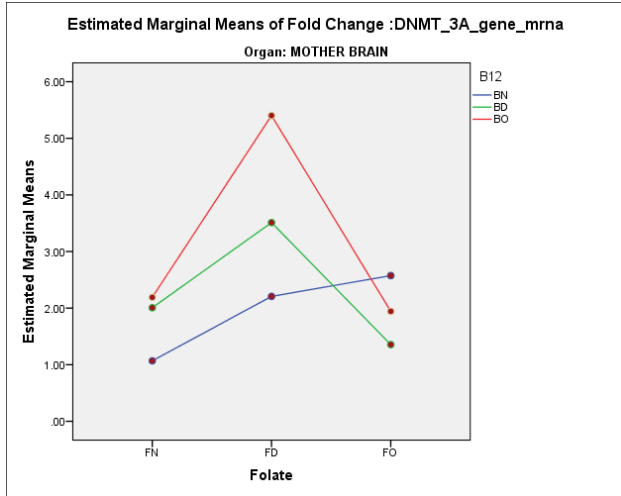

(A)

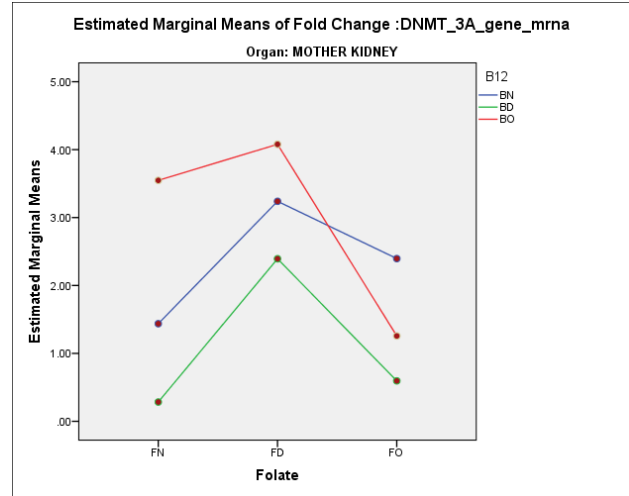

(B)

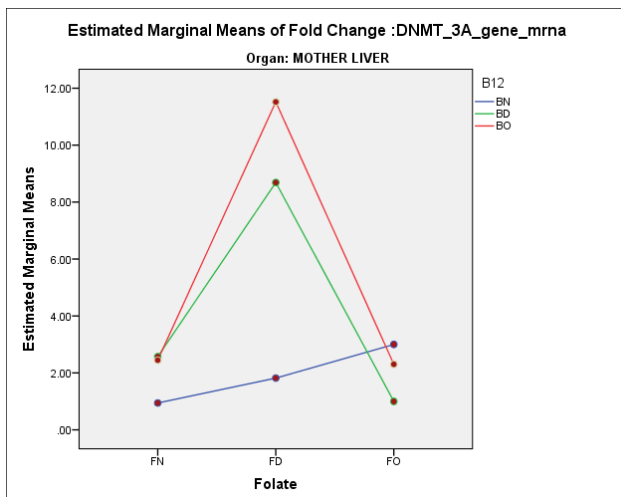

(C)

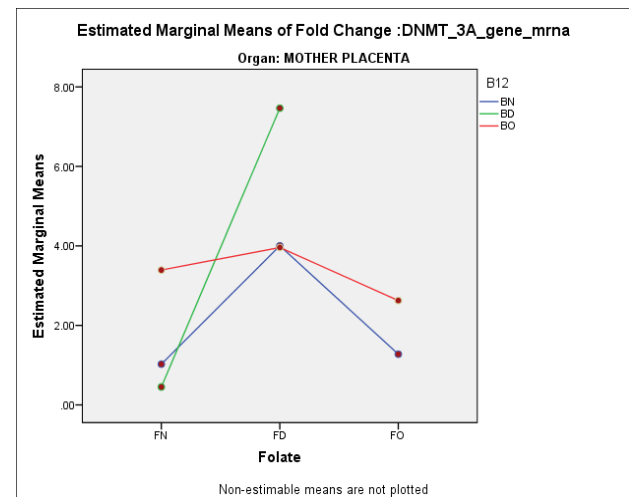

(D)

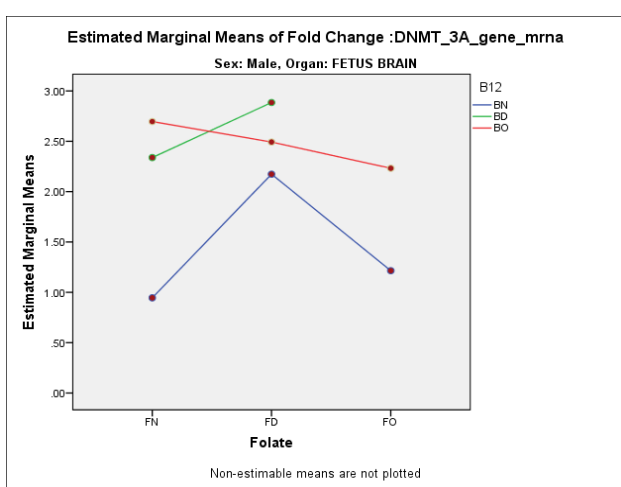

E (i)

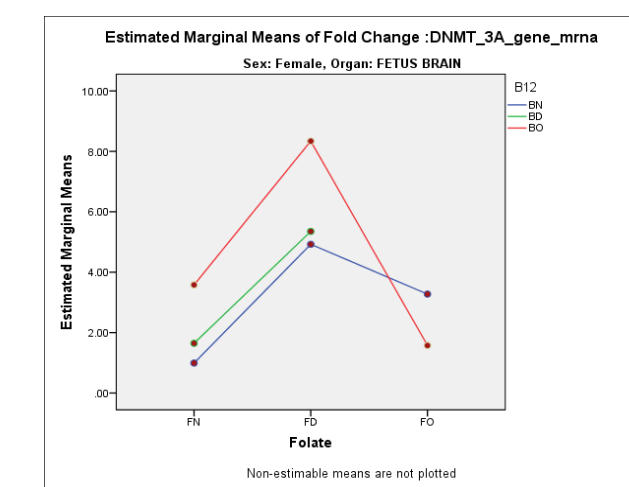

E (ii)

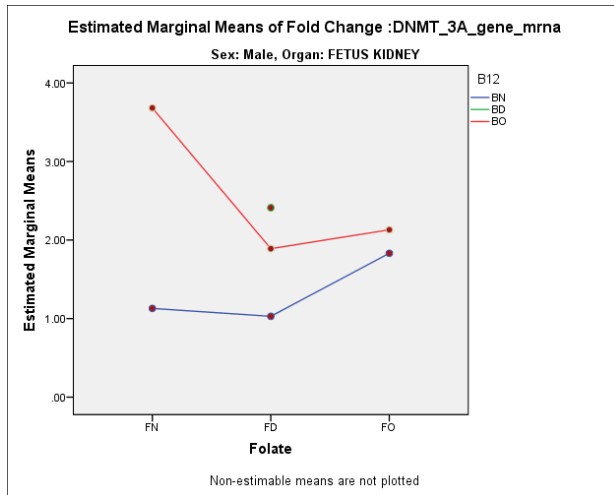

F (i)

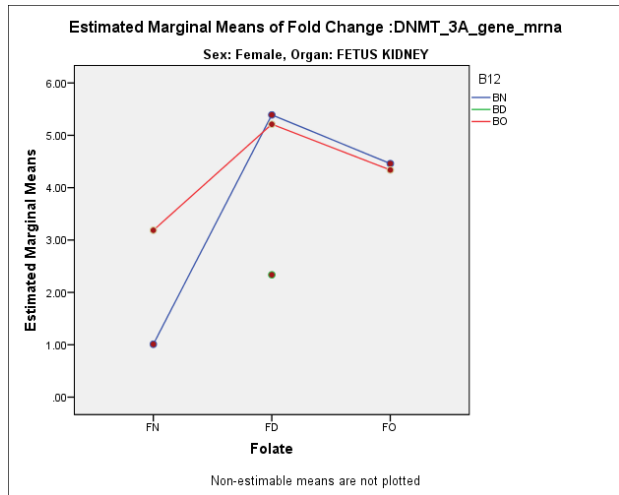

F (ii)

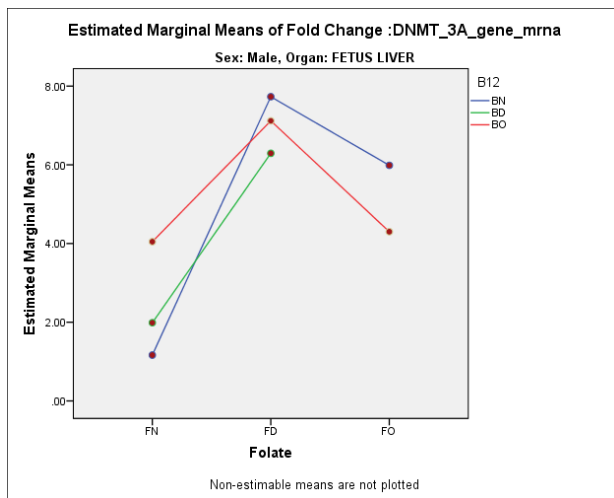

G (i)

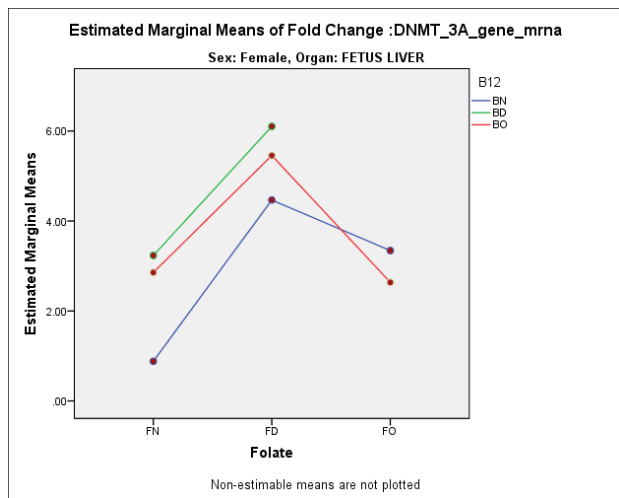

G (ii)

Supplementary figure 15: Profile plots of mRNA expression of DNMT3A in maternal tissues (A) Brain (F=5.1, df=4) (B) Kidney (F=7.2, df=4) (C) Liver (F=54.7, df=4) (D) Placenta (F=16.4, df=3), fetal tissues (E) (i) Brain (male) (F=1.0, df=3) (ii) Brain (female) (F=6.9, df=3) (F) (i) Kidney (male) (F=5.3, df=2) (ii) Kidney (female) (F=2.18, df=2) (G) (i) Liver (male) (F=4.8, df=3) (ii) Liver (female) (F=1.86, df=3)

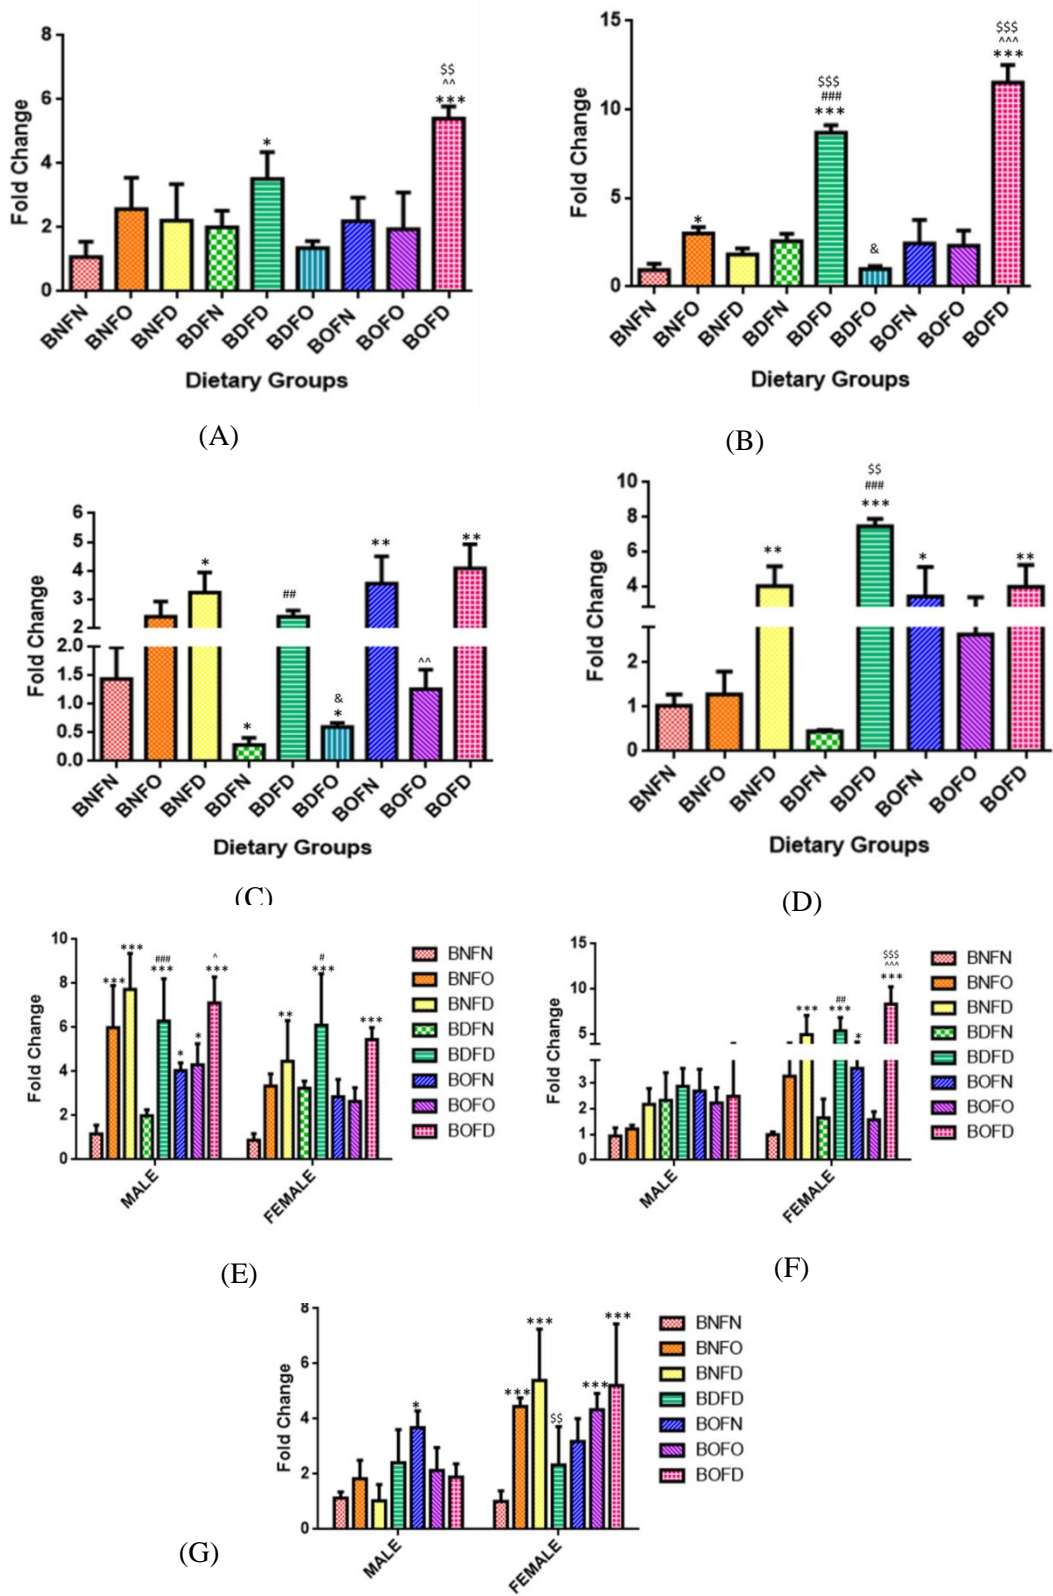

**Supplementary figure 16: Fold change in mRNA of DNMT3A gene in maternal tissues (A) Brain (F= 8.21, df=8) (B) Liver (F= 86.47, df=8) (C) Kidney (F= 16.53, df=8) (D) Placenta (F= 23.55, df=7), fetal tissues (E) Liver (Male) (F=14.1, df=7), (Female) (F=8.39, df=7) (F) Brain (Male) (F=2.88, df=7), (Female) (F=16.3, df=7) (G) Kidney (Male) (F=6.17, df=6), (Female) (F=6.23, df=6) normalized with GAPDH. \*p < 0.05, \*\*p < 0.01, \*\*\*p < 0.001 vs BNFN, #p < 0.05, ###p < 0.01, ####p < 0.001 vs BDFN, ^p < 0.05, ^^p < 0.01, ^^p < 0.001 vs BOFN, \$p < 0.05, \$\$p < 0.01, \$\$\$p < 0.001 vs BNFD and &p < 0.05, &&p < 0.01, &&&p < 0.001 vs BNFO. (N=4)**

The data is presented as mean ± SD. B12 normal folate normal (BNFN), B12 normal folate over-supplemented (BNFO), B12 normal folate deficient (BNFD), B12 deficient folate normal (BDFN), B12 deficient folate over-supplemented (BDFO), B12 deficient folate deficient (BDFD), B12 over-supplemented folate normal (BOFN), B12 over-supplemented folate over-supplemented (BOFO), B12 over-supplemented folate deficient (BOFD)

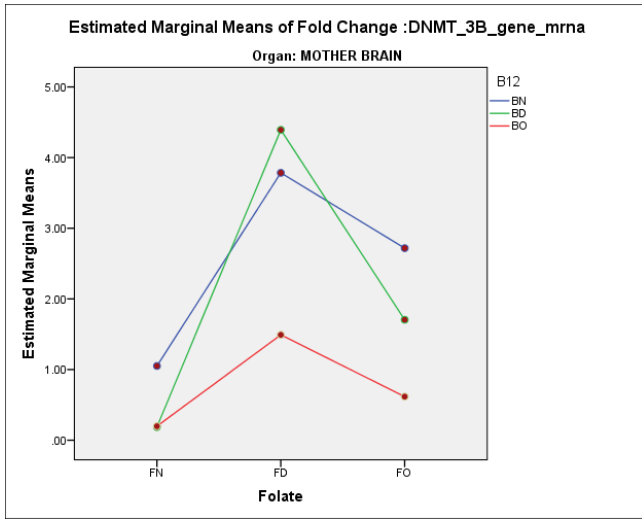

(A)

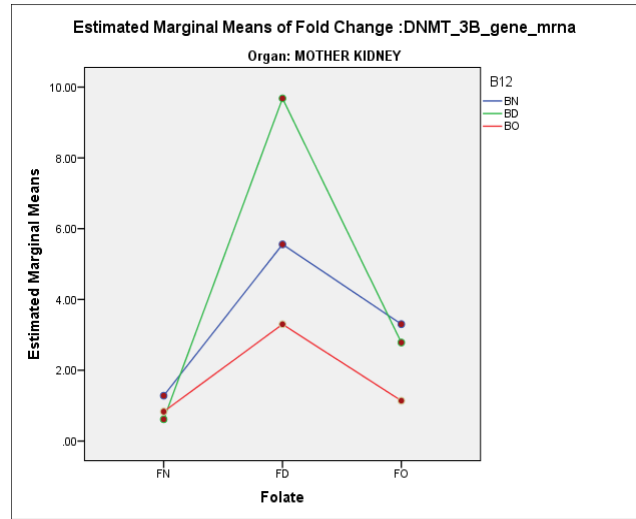

(B)

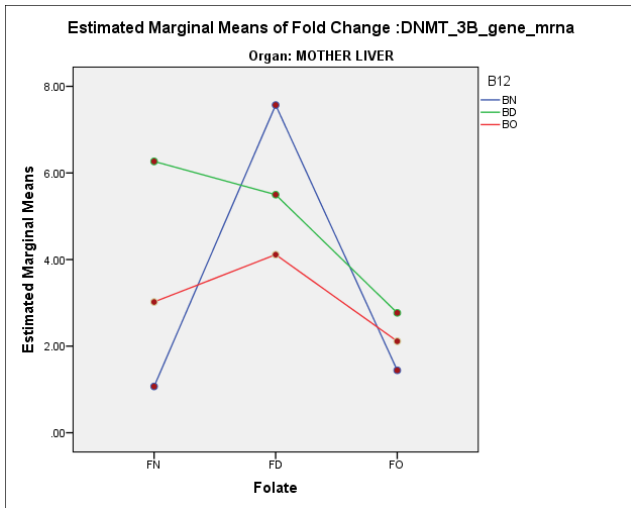

(C)

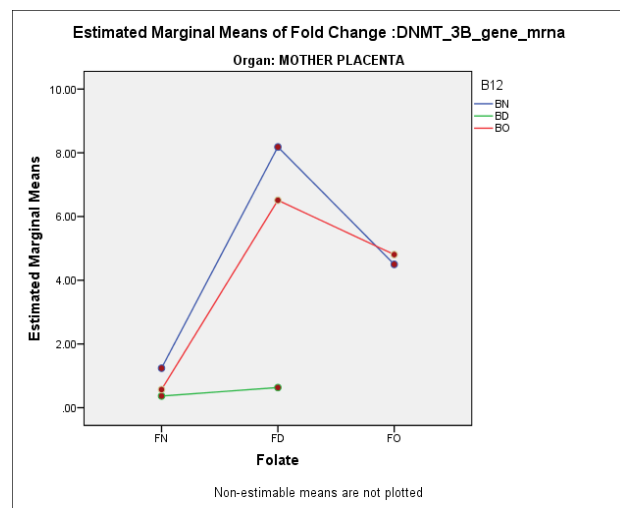

(D)

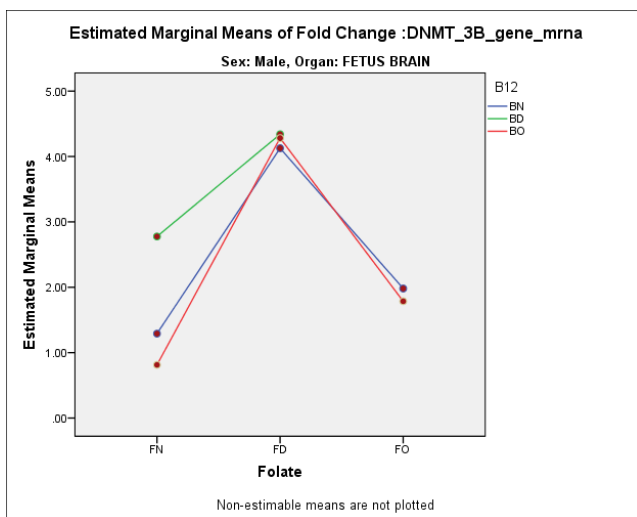

E (i)

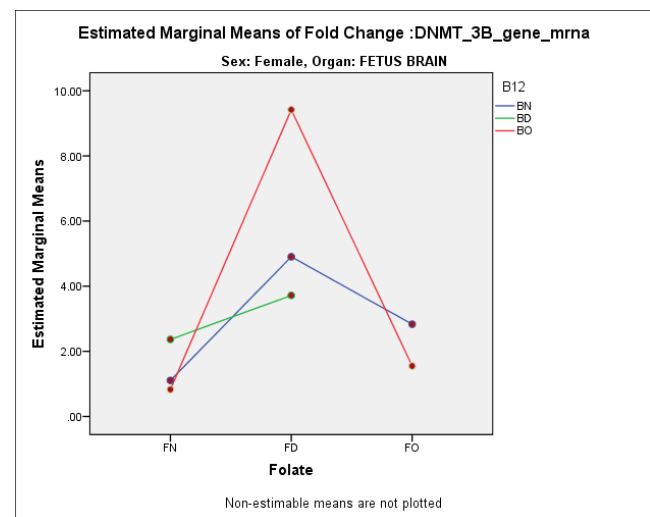

E (ii)

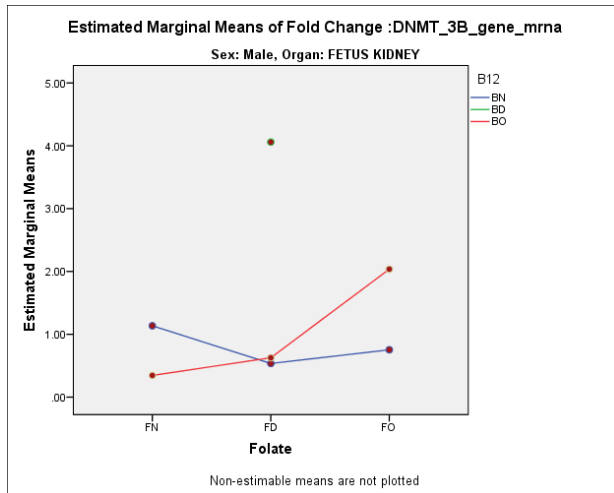

F (i)

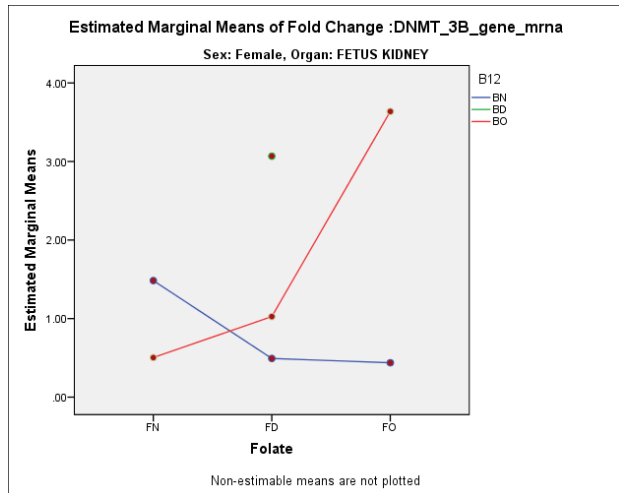

F (ii)

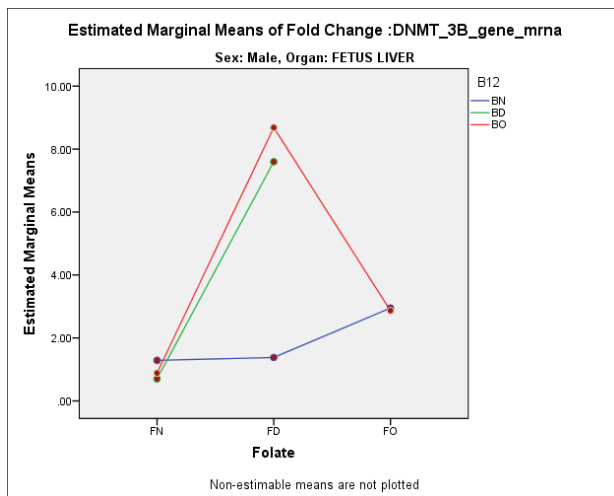

G (i)

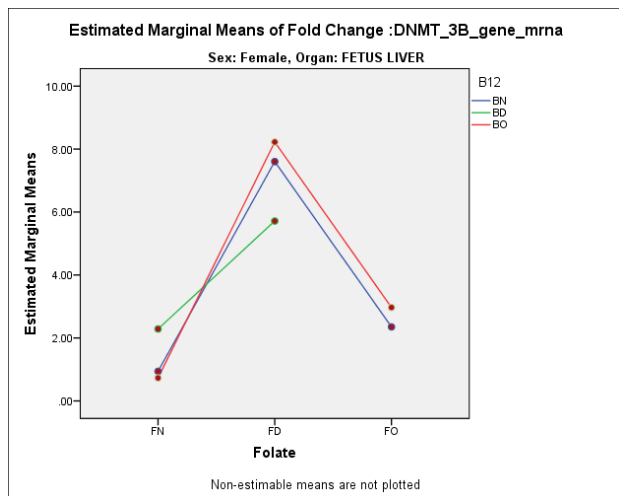

G (ii)

Supplementary figure 17: Profile plots of mRNA expression of DNMT3B in maternal tissues (A) Brain (F=4.4, df=4) (B) Kidney (F=44.0, df=4) (C) Liver (F=13.9, df=4) (D) Placenta (F=24.9, df=3), fetal tissues (E) (i) Brain (male) (F=1.6, df=3) (ii) Brain (female) (F=28.1, df=3) (F) (i) Kidney (male) (F=8.3, df=2) (ii) Kidney (female) (F=32.7, df=2) (G) (i) Liver (male) (F=45.7, df=3) (ii) Liver (female) (F=11.5, df=3)

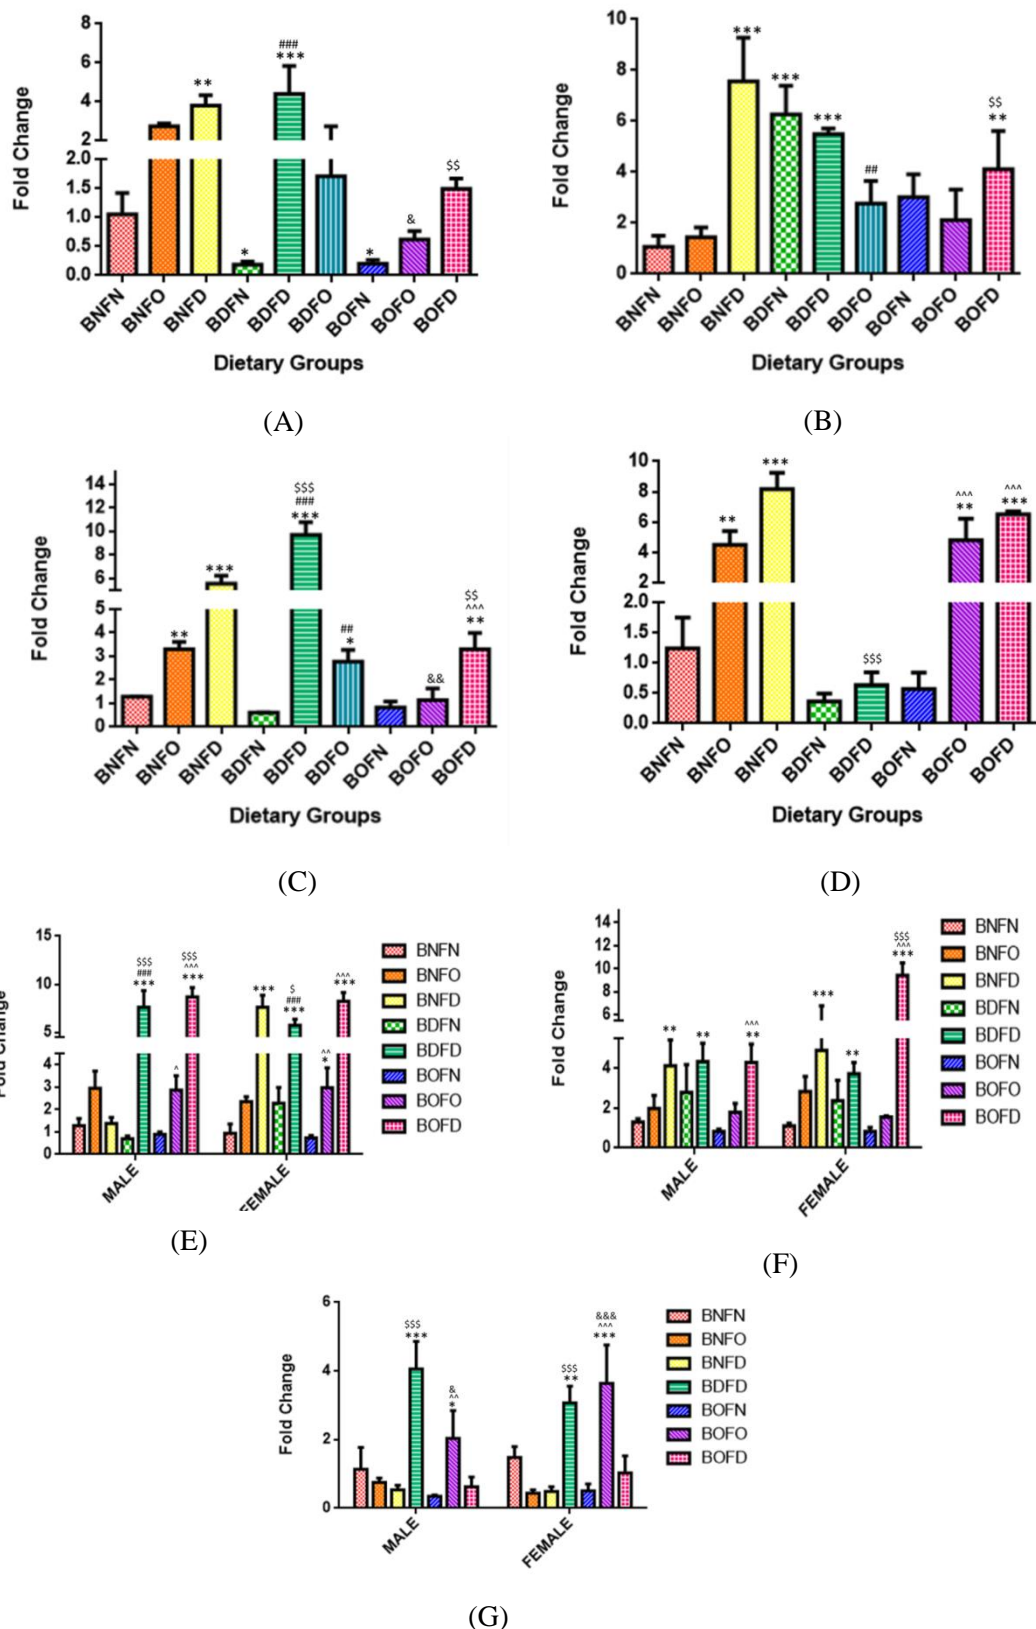

**Supplementary figure 18: Fold change in mRNA of DNMT3B gene in maternal tissues (A) Brain (F= 17.61, df=8) (B) Liver (F= 18.61, df=8) (C) Kidney (F= 112.1, df=8) (D) Placenta (F= 50.89, df=7), fetal tissues (E) Liver (Male) (F=60.9, df=7), (Female) (F=63.8, df=7) (F) Brain (Male) (F=10.7, df=7), (Female) (F=38.1, df=7) (G) Kidney (Male) (F=26.6, df=6), (Female) (F=25.3, df=6) normalized with GAPDH. \*p < 0.05, \*\*p < 0.01, \*\*\*p < 0.001 vs BNFN, #p < 0.05, ##p<0.01, ###p < 0.001 vs BDFN, ^p < 0.05, ^^p<0.01, ^^p < 0.001 vs BOFN, \$p < 0.05, \$\$p<0.01, \$\$\$ p < 0.001 vs BNFD and &p < 0.05, &&p<0.01, &&& p < 0.001 vs BNFO. The data is presented as mean ± SD. (N=4)**

B12 normal folate normal (BNFN), B12 normal folate over-supplemented (BNFO), B12 normal folate deficient (BNFD), B12 deficient folate normal (BDFN), B12 deficient folate over-supplemented (BDOF), B12 deficient folate deficient (BDFD), B12 over-supplemented folate normal (BOFN), B12 over-supplemented folate over-supplemented (BOFO), B12 over-supplemented folate deficient (BOFD)



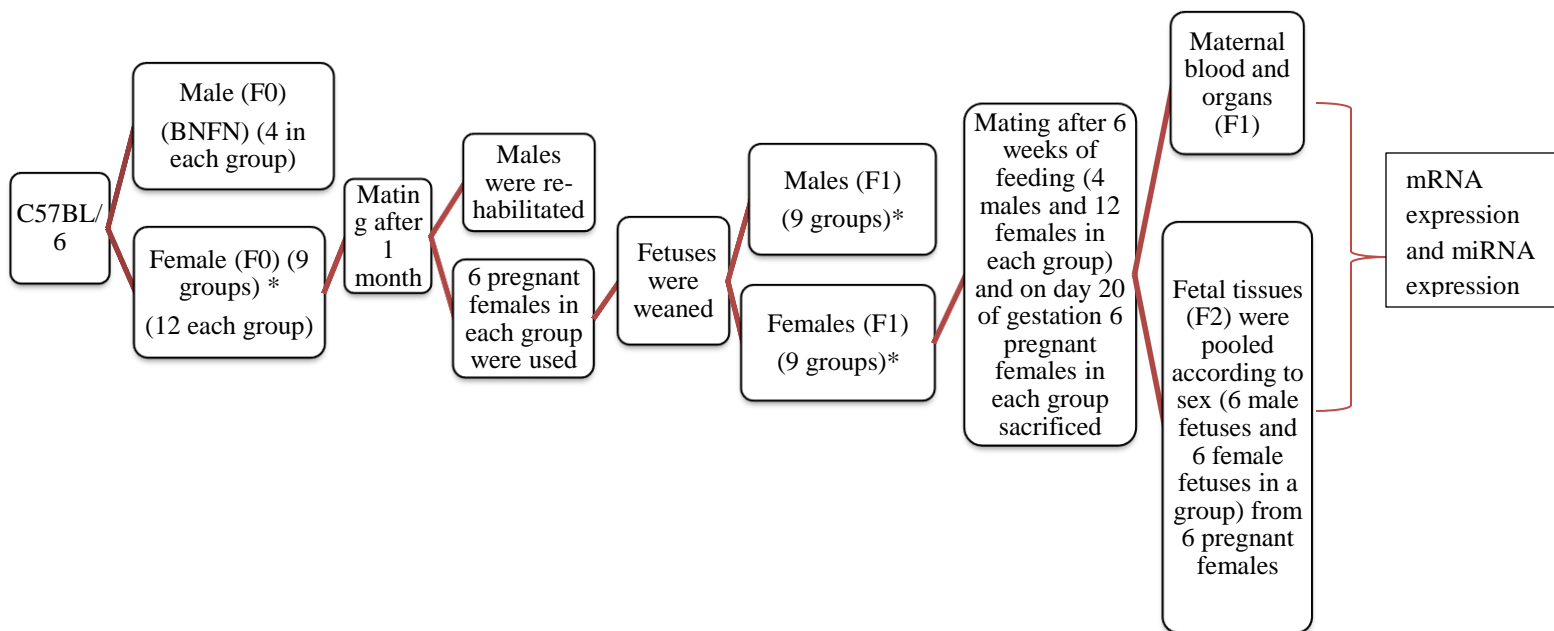

\*B12 normal folate normal (BNFN), B12 normal folate over-supplemented (BNFO), B12 normal folate deficient (BNFD), B12 deficient folate normal (BDFN), B12 deficient folate over-supplemented (BDFO), B12 deficient folate deficient (BDFD), B12 over-supplemented folate normal (BOFN), B12 over-supplemented folate over-supplemented (BOFO), B12 over-supplemented folate deficient (BOFD)

**Supplementary figure 19: Work flow of the study**



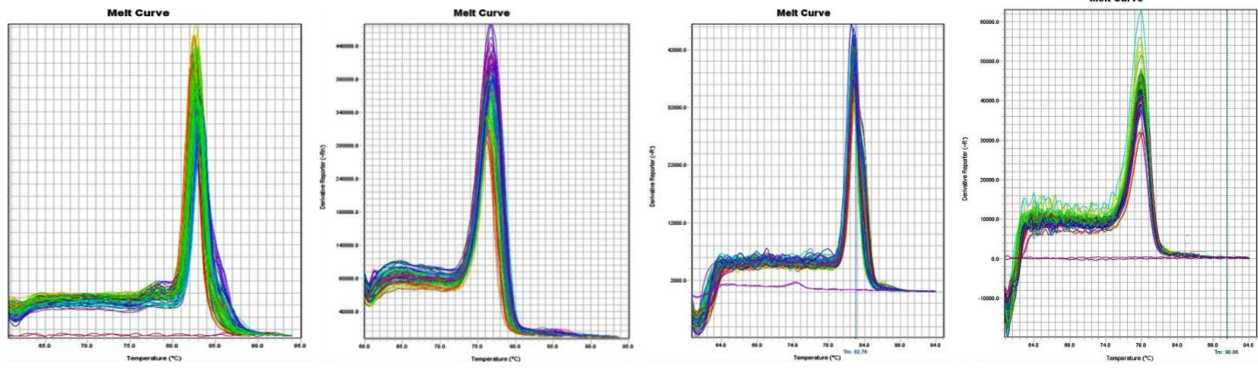

(A)

(B)

(C)

(D)

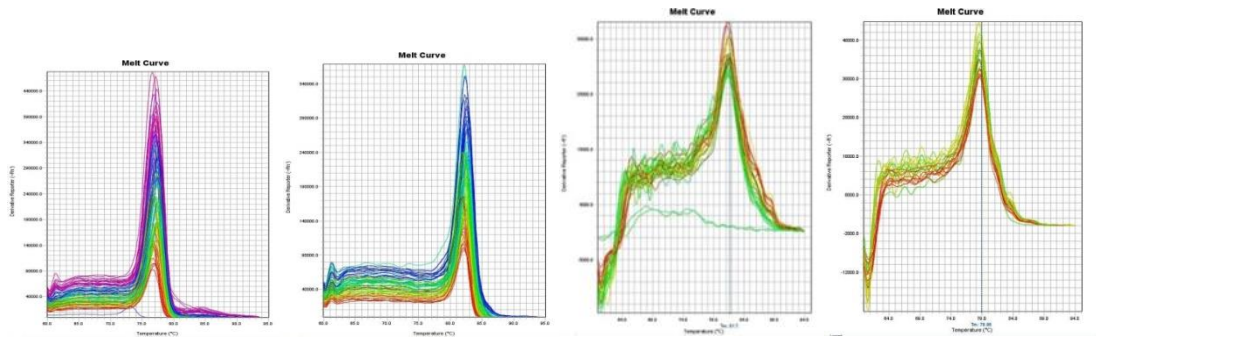

(E)

(F)

(G)

(H)

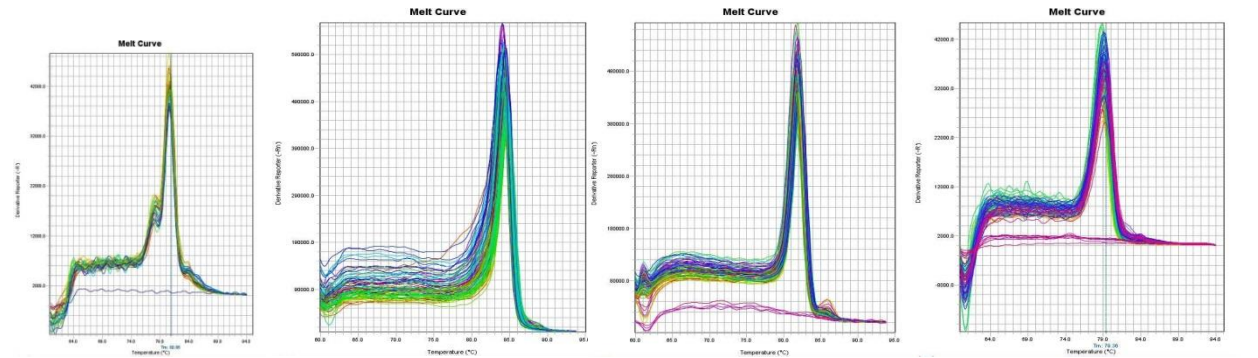

(I)

(J)

(K)

(L)

Supplementary figure 20: Melting profile of genes under study A) RFC, B) PCFT, C) FOLR1, D) GAPDH E) LMBRD1 F) TC-II G) miRNA-483, H) miRNA-221 I) miRNA-133 J) DNMT1 K) DNMT3A L) DNMT3B

**Supplementary table 1: Primer sequences for SRY and MYOGENIN**

| Gene     | Primer sequence                | Length |
|----------|--------------------------------|--------|
| SRY      | F: 5'-TCATGAGACTGCCAACCACAG-3' | 441bp  |
|          | R: 5'-CATGACCACCACCACCACCAA-3' |        |
| MYOGENIN | F: 5'-CGTGGGCATGTAAGGTGTGTA-3' | 79bp   |
|          | R: 5'-CCTGCGCTTCTCCCTCAGT-3'   |        |

**Supplementary table 2: mRNA primer sequence**

| Gene   | Primers sequence                                    | Annealing Temp. (°C) | Product |
|--------|-----------------------------------------------------|----------------------|---------|
| GAPDH  | F: AGCTTGTCATCAACGGGAAG<br>R: TTTGATGTTAGTGGGGTCTCG | 62°C                 | 61 bp   |
| RFC    | F- GGGTGTGCTACGTGACCTTT<br>R- ACGGAACTGATCACGGACTT  | 58°C                 | 211bp   |
| PCFT   | F- GAATGGTGGTCTTTGCGTTT<br>R- TCCGTACCCTGTGAACATGA  | 62°C                 | 55bp    |
| FOLR1  | F- GGCCCTGAGGACAATTTACA<br>R- TCGGGGAACACTCATAGAGG  | 61°C                 | 194bp   |
| LMBRD1 | F-AGCAGGAATAGATTCGGGTTTCA<br>R-TTTGTAACAACGGCAAAGCA | 60°C                 | 79bp    |
| TC-II  | F-AGGCCCTGAGGGCTACTT<br>R-CCCGGATGCAGGAGATGTC       | 60°C                 | 79bp    |
| DNMT1  | F-CGGTCATTCCAGATGATTCTC<br>R-TGCTGTGGATGTAGGAAAGCTG | 60°C                 | 200bp   |
| DNMT3A | F-TCCCGGGCCGACTGCGA<br>R-TCCCCACACCAGCTCTC          | 62°C                 | 400bp   |
| DNMT3B | F-GAACATGCGCCTGCAAGA<br>R-GCACAGACTTCGGAGGCAAT      | 62°C                 | 204bp   |

Amp.Length bp= Amplicon length in base pairs.

**Supplementary Table 3: miRNA primer sequence**

| micro RNA | Sequence                                    |
|-----------|---------------------------------------------|
| miR-483   | ACGGGAGAAGAGAAGGGAGTGGTTTTTGGGTGCCTCACTCCTC |
| miR-221   | ACCTGGCATAACAATGTAGATTTCTGT                 |
| miR-133   | GCTGGTCAAACGGAACCAAGTC                      |
